# Supplementary material for: Novel Introner-Like Elements in fungi Are Involved in Parallel Gains of Spliceosomal Introns
Source: PubMed Central journal article supplement (PMC4457414; doi:10.1371/journal.pone.0129302), 2015-06-05
Supplement: pone.0129302.s001.pdf [file pone.0129302.s001.pdf]

## S1 File. Sequences used to build the fungal species phylogenetic tree

>Passalora capsicicola-CBS156.62

TAACAAGGTCTCCGTAGGTGAACCTGCGGAGGGATCATTACTGAGTGAGGGCGAAAAGCCCGACCTCCAACCCTTT  
GTGAACCAACTCTGTTGCTTCGGGGGCGACCCCGCGTCTCGGGGACGGCGCCCCCGGAGGTCATCAAACACTGC  
ATCTTTGCGTTCGGAGTCTTGAAGTAAATTTAAACAAAACCTTTCAACAACGGATCTCTTGGTTCTGGCATCGATGA  
AGAACGCAGCGAAATGCGATAAGTAATGTGAATTGCAGAATTCAGTGAATCATCGAATCTTTGAACGCACATTGC  
GCCCCGTGGTATTCCGCGGGGCATGCCTGTTTCGAGCGTCATTTCAACACTCAAGCCTCGCTTGGTATTGGGCGTC  
GCGGTTCCGCGCCCTTAAAGTTTCCGGCTGAGCAGTTCGTCTCTAAGCGTTGTGGCATATATTTCCGCTGAAGAG  
CTCGGACGGTTCCGGCCGTTAAATCTTTCTAAAGGTTGACCTCGGATCAGGTAGGGATACCCGCTGAACCTTAAGC  
ATATGAAGCGGCAACAGCTCAAATTTGAAATCTGGCGCAAGCCCCGAGTTGTAATCTGTAGAGGATGCTTCTGGC  
CAGCGGCCGTTCTAAGTTCCTTGGAAACAGGACGTCATAGAGGGTGAGAATCCCGTATGTGACCGGCGCGCAGCCT  
TTACGTAGCTCCTTCGACGAGTCGAGTTGTTTGGGAATGCAGCTCTAAATGGGAGGTAAATTTCTTCTAAAGCTA  
AATACCGGCCAGAGACCGATAGCGCACAAGTAGAGTGATCGAAAGATGAAAAGCACTTTGGAAAAGAGAGTTAAAA  
AGCACGTGAAATTTGTTGAAAGGGAAGCGCTTGCAACCAGACTTCGTAGCGGTGTTCGCGCGGTCTTCTGACCGGT  
CTACTCATCGTCGCGAGGCCAACATCGTCTGGGACCGCTGGATAAGACCTAAGGAATGTGGCTTCCCTCGGGAAG  
TGTTATAGCCTGTGGTGATGCAGCGAGTCCCGGGCGAGGTCCGCGCTTCGGCAAGGATGTTGGCGTAATGGTTGT  
CAGCGGCCCGTCTTGAACACGGACCAAGGAGTCTAACATCTATGCGAGTGTTCGGGTGTCAAACCCCTACGCGT  
AATGAAAGTGAACGGAGGTGGGAAGCGCAAGCTGCACCATCGACCGATCCTGATGTCTCGGATGGATTTGAGTA  
AGAGCATAGCTGTTGGGACCCGAAAGATGGTGAACACTATGCCTGAATAGGGTGAAGCCAGAGGAAACTCTGGTGG  
GGCTCGCAGCGGTTCTGACGTGCAAATCGATCGTCAAATTTGGGTATAGGGGCGAAAAGACTAA

>Passalora brachycarpa-CBS115124

GTAACAAGGTCTCCGTAGGTGAACCTGCGGAGGGATCATTACTGAGTGAGGGCTCACGCCCGACCTCCAACCCTT  
TGTGAACCAACTCTGTTGCTTCGGGGGCGACCCCGCGTTCGGCGACGGCGCCCCCGGAGGTCATCAAACACTG  
CATCTTTGCGTTCGGAGTCTTGAAGTAAATTTAAACAAAACCTTTCAACAACGGATCTCTTGGTTCTGGCATCGATG  
AAGAACGCAGCGAAATGCGATAAGTAATGTGAATTGCAGAATTCAGTGAATCATCGAATCTTTGAACGCACATTG  
CGCCCCGTGGTATTCCGCGGGGCATGCCTGTTTCGAGCGTCATTTCAACACTCAAGCCTAGCTTGGTATTGGGCGT  
CCGCGGTTCCGCGCGCCTTAAAGTCTCCGGCTGAGCAGTTCGTCTCTAAGCGTTGTGACATATATTTCCGCTGAAG  
AGTTCCGGACGGCTTTTGGCCGTTAAATCTTTCTCAAGGTTGACCTCGGATCAGGTAGGGATACCCGCTGAACCTA  
AGCATATCAATAAGCGGAGGAAAAGAAAACCAACAGGGATTGCCCTAGTAACGGCGAGTGAAGCGGCAACAGCTCA  
AATTTGAAATCTGGCGCAAGCCCGAGTTGTAATTTGTAGAGGATGCTTCTGGCCAGCGGCCGTTCTAAGTTCCCTT  
GGAACAGGACGTCATAGAGGGTGAGAATCCCGTATGTGACCGGCGCGCAGCCTTTACGTAGCTCCTTCGACGAGT  
CGAGTTGTTTGGGAATGCAGCTCTAAATGGGAGGTAAATTTCTTCTAAAGCTAAATACCGGCCAGAGACCGGATAG  
CGCACAAGTTAGAGTGATCGAAAGATGAAAAGCACTTTGGAAAAGAGAGTTAAAAAGCACGTGAAAATGTTGAAAAG  
GAAGCGCTTGCAACCAGACTTCGTAGCGATGTTCCGCTGGTCTTCTGACCGGTCTACTCATCGTCGCGAGGCCAA  
CATCGTCTGGGCCCGCTGGATAAGACCTAAGGAATGTGGCTTCCCTCGGGAAGTGTATAGCCTGTGGTGATGCA  
GCGTGGCTCGGGCGAGGTCCGCGCTTCGGCAAGGATGTTGGCGTAATGGTTGTGACGGCCCGTCTTGAACACG  
GACCAAGGAGTCTAACATCTATGCGAGTGTTCGGGTGTCAAACCCCTACGCGTAATGAAAAGTGAACGGAGGTGGG  
AAGCGCAAGCTGCACCATCGACCGATCCTGATGTCTCGGATGGATTTGAGTAAGAGCATAGCTGTTGGGACCCG  
AAAGATGGTGAACACTATGCCTGAATAGGGTGAAGCCAGAGGAAACTCTGGTGGAGGCTCGCAGCGGTTCTGACGTG  
CAAATCGATCGTCAAATTTGGGTATAGGGGCGAAAAGACTAATCGAACCATCTAGTAGCTGGTTCCCTGC

>Passalora smilacis-CBS556.71

GTAACAAGGTCTCCGTAGGTGAACCTGCGGAGGGATCATTACTGAGTGAGGGCTCACGCCCGACCTCCAACCCTT  
TGTGAACCATCTCTGTTGCTTCGGGGGCGACCCCGCGTTCGGCGGGCGCCCCCGGAGGTCATCAAACACGG  
CATCTCTGCGTTCGGAGTCTTAAAGTAAATGTAAACAAAACCTTTCAACAACGGATCTCTTGGTTCTGGCATCGATG  
AAGAACGCAGCGAAATGCGATAAGTAATGTGAATTGCAGAATTCAGTGAATCATCGAATCTTTGAACGCACATTG  
CGCCCCGTGGTATTCCGCGGGGCATGCCTGTTTCGAGCGTCATTTCAACACTCAAGCCTCGCTTGGTATTGGGCGC  
CGCGGTCTCCGCGCGCCTCAAAGTCTCCGGCTGGGTTCGTCCGCTCTAAGCGTTGTGGCATAGCTGTGCTAAAG  
AGTGCGGGTGGCCGTCGGCCGTTAAATCTTTCTCAAGGTTGACCTCGGATCAKGTAGGGATACCCGCTGAACCTA  
AGCATATCAATAAGCGGAGGAAAAGAAAACCAACAGGGATTGCCCTAGTAACGGCGAGTGAAGCGGCAACAGCTCA  
AATTTGAAATCTGGCGCAAGCCCGAGTTGTAATTTGTAGAGGATGCTTCTGGCCAGCGGCCGTTCTAAGTTCCCTT  
GGAACAGGACGTCATAGAGGGTGAGAATCCCGTATGTGACCGGCGCGCAGCCTTTACGTAGCTCCTTCGACGAGT  
CGAGTTGTTTGGGAATGCAGCTCTAAATGGGAGGTAAATTTCTTCTAAAGCTAAATACCGGCCAGAGACCGGATAG  
CGCACAAGTAGAGTGATCGAAAGATGAAAAGCACTTTGGAAAAGAGAGTTAAAAAGCACGTGAAAATGTTGAAAAG  
GAAGCGCTTGCAACCAGACTTCGCGGGCGGTGTTCCGCGCGTCTTCTGACCGGTCCACTCATCGTCGCGAGGCCAA  
CATCGTCTGGGCCCGCTGGATAAGACCTCAGGAATGTAGCTTCCCTCGGGAAGTGTATAGCCCGTGGTGATGCA  
GCGCGGTTCGGGCGAGTCCGCGCTTCGCAAGGATGTTGGCGTAATGGTTGTGACGGCCCGTCTTGAACACG  
GACCAAGGAGTCTAACATCTATGCGAGTGTTCGGGTGTCAAACCCCTACGCGTAATGAAAAGTGAACGGAGGTGGG  
AAGCGCAAGCTGCACCATCGACCGATCCTGATGTCTCGGATGGATTTGAGTAAGAGCATAGCTGTTGGGACCCG  
AAAGATGGTGAACACTATGCCTGAATAGGGTGAAGCCAGAGGAAACTCTGGTGGAGGCTCGCAGCGGTTCTGACGTG  
CAAATCGATCGTCAAATTTG

>Passalora miurae-CPC14643

TAACAAGGTCTCCGTAGGTGAACCTGCGGAGGGATCATTACTGAGTGAGGGCTCACGCCCCGACCTCAACCCCTT  
GTGAACCAACTCTGTTGCTTCGGGGGCGACCCCGCCGTTTCGGCGACGGCGCCCCCGGAGGTCATCAAACACTGC  
ATCTTCGCGTTCGGAGTCTCAAGTAAATTTGAACAAAACCTTTCAACAACGGATCTCTTGGTTCTGGCATCGATGAA  
GAACGCAGCGAAATGCGATAAGTAATGTGAATTGAGAATTCAGTGAATCATCGAATCTTTGAACGCACATTGCCG  
CCCCGTGGTATTCGCGGGGGCATGCCTGTTTCGAGCGTCATTTACCACCTCAAGCCTAGCTTGGTATTGGGCGTCCG  
CGGGTCCGCGCGCCTTAAAGTCTCCGGCCGAGTAGTCCGTCTCTCAGCGTTGTGGCATATATTTGCTGAAGAGG  
ATATCAATAAGCGGAGGAAAAGAAAACCAACAGGGATTGCCCCAGTAACGGCGAGTGAAGCGGCAACAGCTCAAAT  
TTGAAATCTGGCGCAAGCCCCGAGTTGTAATTTGTAGAGGATGCTTCTGGCCAGCGGCCGTTCTAAGTTCCTTGGGA  
ACAGGACGTCATAGAGGGTGAGAATCCCGTATGTGACCGGCGCGCAGCCTTTACGTAGCTCCTTCGACGAGTTCGA  
GTTGTTTGGGAATGCAGCTCTAAATGGGAGGTAAATTTCTTCTAAAGCTAAATACCGGCCAGAGACCGATAGCGC  
ACAAGTAGAGTGATCGAAAGATGAAAAGCACTTTGGAAAGAGAGTTAAAAAGCACGTGAAATTTGTTGAAAGGGAA  
GCGCTTGCAACCAGACTTCGTAGCGATGTTCCGCTGGTCTTCTGACCGGTCTACTCATCGTCGCGAGGCCAACAT  
CGTCTGGGCCCGCTGGATAAGACCTAAGGAATGTAGCTTCCCTCGGGAAGTGTATAGCCTGTGGTGATGCAGCG  
CGGCTCGGGCGAGGTCCGCGCTTCGGCAAGGATGTTGGCGTAATGGTTGTGACGGGCCGCTTGTAAACACGGAC  
CAAGGAGTCTAACATCTATGCGAGTGTTCGGGTGTCAAACCCCTACGCGTAATGAAAGTGAACGGAGGTGGGAA  
CGCAAGCTGCACCATCGACCGATCCTGATGTCTCGGATGGATTTGAGTAAGAGCATAGCTGTTGGGACCCGAAA  
GATGGTGAACATATGCCTGAATAGGGTGAAGCCAGAGGAAACTCTGGTGGAGGCTCGCAGCGGTTCTGACGTGCAA  
ATCGATCGTCAAATTTGGGTATAGGGGCGAAAAGACTAATCGAACCAT

>Passalora daleae-CBS113031

TTGGAAGTAAAWRTCGTAACAAGGTCTCCGTAGGTGAACCTGCGGAGGGATCATTACTGAGTGAGGGGGCAACCC  
CGACCTCAACCCCTTTGTGAACCAACTCTGTTGCTTCGGGGGCGACCCCGCCGTTTCGGCGACGGCGCCCCCGGA  
GGTCATCAAACACTGCATCTATGCGTTCGGAGTCTTAAAGTAAATTTAAACAAAACCTTTCAACAACGGATCTCTTG  
GTTCTGGCATCGATGAAGAACGCAGCGAAATGCGATAAGTAATGTGAATTGAGAATTCAGTGAATCATCGAATC  
TTTGAACGCACATTGCGCCCCGTGGTATTCCGCGGGGCATGCCTGTTTCGAGCGTCATTTACCACCTCAAGCCTAG  
CTTGGTATTGGGCGTCCGCGCTTAAAGTCTCCGGCTGAGCAGTTCGCCCTTAAGCGTTGTGGCAT  
ATATTTGCTGAAGAGTACGGACGGCTTCTGGCCGTTAAATCTTTATTCAAGGTTGACCTCGGATGCAGTAGGTC  
GAGCAGCATATCAATAAGCGGAGGAAAAGAAAACCAACAGGGATTGCCCTAGTAACGGCGAGTGAAGCGGCAACA  
GCTCAAATTTGAAATCTGGCGCAAGCCCCGAGTTGTAATTTGTAGAGGATGCTTCTGGCCAGCGGCCGTTCTAAGT  
TCCTTGGAAACAGGACGTCATAGAGGGTGAGAATCCCGTATGTGACCGGCGCGCAGCCTTTACGTAGCTCCTTCGA  
CGAGTCGAGTTGTTGGGAATGCAGCTCTAAATGGGAGGTAAATTTCTTCTAAAGCTAAATACCGGCCAGAGACC  
GATAGCGACAAGTAGAGTGATCGAAAGATGAAAAGCACTTTGGAAAGAGAGTTAAAAAGCACGTGAAATTTGTTG  
AAAGGGAAGCGCTTGAACACAGACTTCGTAGCGGTGTTCCGCGGCTTCTTCTGACCGGTCTACTCATCGTCGCGAG  
GCCAACATCGTCTGGGACCGCTGGATAAGACCTAAGGAATGTAGCTTCCCTCGGGAAGTGTATAGCCTGTGGTG  
ATGCAGCGTGTCTCGGGCGAGGTCCGCGCTTCGGCAAGGATGTTGGCGTAATGGTTGTGACGGGCCGCTTGTGAA  
ACACGGACCAAGGAGTCTAACATCTATGCGAGTGTTCGGGTGTCAAACCCCTACGCGTAATGAAAGTGAACGGAG  
GTGGGAAGCGCAAGCTGCACCATCGACCGATCCTGATGTCTCGGATGGATTTGAGTAAGAGCATAGCTGTTGGG  
ACCCGAAAGATGGTGAACATATGCCTGAATAGGGTGAAGCCAGAGGAAACTCTGGTGGAGGCTCGCAGCGGTTCTG  
ACGTGCAAATCGATCGTCAAATTTGGGTATAGGGGCGAAAAGACTAATCGAACCATCTAGTAGCTGGTTCCTGCCG  
AAG

>Passalora perfoliati-CBS113378

TAACAAGGTCTCCGTAGGTGAACCTGCGGAGGGATCATTACTGAGTGAGGGCGCAAGCCCGACCTCAACCCCTTT  
GTGAACCAACTCTGTTGCTTCGGGGGCGACCCCGCCGTTTCGGCGACGGCGCCCCCGGAGGTCCTCAAACACTGC  
ATCTTTGCGTTCGGAGTCTTAAAGTAAATTTAAACAAAACCTTTCAACAACGGATCTCTTGGTTCTGGCATCGATGA  
AGAACGCAGCGAAATGCGATAAGTAATGTGAATTGAGAATTCAGTGAATCATCGAATCTTTGAACGCACATTGC  
GCCCCGTGGTATTCCGCGGGGCATGCCTGTTTCGAGCGTCATTTACCACCTCAAGCCTCGCTTGGTATTGGGCGTC  
GCGGTTCCGCGCGCCTTAAAGTCTCCGGCTGAGCAGTTACGTCTCTAAGCGTTGTGGCATATCAATTCGCTGAAG  
AGTTTCGGACGGCTTTTGGCCGTTAAATCTTTCTTAAAGGTTGACCTCGGATCAGGTAGGGATAACCCGCTGAACCT  
AAGCATATCAAGAAGCGGCAACAGCTCAAATTTGAAATCTGGCGCAAGCCCCGAGTTGTAATTTGTAGAGGATGC  
TTCTGGCCAGCGGGCCGTTCTAAGTTCCTTGGAAACAGGACGTCATAGAGGGTGAGAATCCCGTATGTGACCGGCG  
CGCAGCCTTTACGTAGCTCCTTCGACGAGTCGAGTTGTTTGGGAATGCAGCTCTAAATGGGAGGTAAATTTCTTC  
TAAAGCTAAATACCGGCCAGAGACCGATAGCGCACAAGTAGAGTGATCGAAAAGATGAAAAGCACTTTGGAAAAGAG  
AGTTAAAAGCACGTGAAATTTGTTGAAAGGGAAAGCGCTTGCAACCAGACTTCGTAGCGATGTTCCGCCGGTCTTC  
TGACCGGTCTACTCATCGTCGCGAGGCCAACATCGTCTGGGACCGCTGGATAAGACCTAAGGAATGTAGCTTCCC  
TCGGGAAGTGTATAGCCTGTGGTGATGCGCGCTGCTCGGGCAGGTTCCGCGCTTCGGCAAGGATGTTGGCGTA  
ATGGTTGTGACGGCCGCTTTGAAACACGGACCAAGGAGTCTAACATCTATGCGAGTGTTCGGGTGTCAAACCC  
CTACGCGTAATGAAAGTGAACGGAGGTGGGAAGCGCAAGCTGCACCATCGACCGATCCTGATGTCTCGGATGGA  
TTTGAAGTAAGAGCATAGCTGTTGGGACCCGAAAAGATGGTGAACATATGCCTGAATAGGGGTGAAGCCAGAGGAAA  
CTCTGGTGGAGGCTCGCAGCGGTTCTGACGTGCAAATCGATCGTCAAATTTGGGTATAGGGGCGAAAAGACT

>Amycosphaerella africana-CBS116154

CTGCGGAGGGATCATTACTGAGTGAGGGCTCACGCCCCGACCTCAACCCCTTTGTGAACCAACTCTGTTGCTTCGG  
GGGCGACCCCGCCGTTTCGGCGACGGCGCCCCCGGAGGTCATCAAACACTGCATCTTTGCGTTCGGAGTCTTAAAG  
TAAATTTAAACAAAACCTTTCAACAACGGATCTCTTGGTTCTGGCATCGATGAAGAACGCAGCGAAATGCGATAAG

TAATGTGAATTGCAGAATTCAGTGAATCATCGAATCTTTGAACGCACATTGCGCCCCGTGGTATTCGCGGGGCA  
TGCCTGTTTCGAGCGTCATTTACCACCTCAAGCCTAGCTTGGTATTGGGCGTCGCGGTTCCGCGCGCCTTAAAGTC  
TCCGGCTGAGCAGTTTCGTCTCTAAGCGTTTGTGGCATATATTTTCGCTGAAGAGTTCGGACGGCTTTTGGCCGTAA  
ATCTTTCTTAAGTTGACCTCGGATCAGGTAGGGATACCCGCTGAACTTAAGCATATCAAGGAAAAAGAAACCAAC  
AGGGATTGCCCTAGTAACGGCGAGTGAAGCGGCAACAGCTCAAATTTGAAATCTGGCGCAAGCCCGAGTTGTAAT  
TTGTAGAGGATGCTTCTGGCCAGCGGCCGTTCTAAGTTCTTGGAACAGGACGTCATAGAGGGTGAGAATCCCGT  
ATGTGACCCGGCGCAGCCTTTACGTAGCTCCTTCGACGAGTCGAGTTGTTTGGGAATGCAGCTCTAAATGGGAG  
GTAAATTTCTTCTAAAGCTAAATACCGGCCAGAGACCGATAGCGCACAAAGTAGAGTGATCGAAAGATGAAAAGCA  
CTTTGGAAAGAGAGTTAAAAAGCACGTGAAATTTGTTGAAAAGGGAAGCGCTTGCAACCAGACTTCGTAGCGATGTT  
CCGCTGGTCTTCTGACCGGTCTACTCATCGTCGCGAGGCCAACATCGTCTGGGCCCGCTGGATAAGACCTAAGGA  
ATGTGGCTTCTTCTCGGGGAAGTGTATAGCCTGTGGTGTGACGCGTGGCTCGGGCGAGGTCGCGCTTCGGCA  
AGGATGTTGGCGTAATGGTTGTGACGCGCCCGTCTTGAACACGGACCAAGGAGTCTAACATCTATGCGAGTGT  
CGGGTGTCAAACCCCTACGCGTAATGAAAGTGAACGGAGGTGGGAAGCGCAAGCTGCACCATCGACCGATCCTGA  
TGCTCTCGGATGGATTTGAGTAAGAGCATAGCTGTTGGGACCCGAAAGATGGTGAACATATGCTTGAATAGGGTGA  
AGCCAGAGGAAACTCTGGTGGAGGCTCGCAGCGGTTCTGACGTGCAAAATCGATCGTCAAATTTGGGTATAGGGG  
GAAAGACTAATCGAACCATC

>Passalora microsora-CBS123735

TAACAAGGTCTCCGTGAACTGCGGAGGGATCATTACTGAGTGAGGGCGCAAGCCCGACCTCCAACCCCTT  
GTGAACCAACTCTGTTGCTTCGGGGGCGACCCCGCCGTTTCGCGCAGCGCGCCCCCGAGGTCATCAAACACTGC  
ATCTTTGCGTCGGAGTCTTAAAGTAAATTTAAACAAAACCTTTCAACAACGGATCTCTTGGTTCTGGCATCGATGA  
AGAACGCAGCGAAATGCGATAAGTAATGTGAATTGCAGAATTCAGTGAATCATCGAATCTTTGAACGCACATTGC  
GCCCCGTGGTATTCCGCGGGGCATGCCTGTTTCGAGCGTCATTTACCACCTCAAGCCTAGCTTGGTATTGGGCGTC  
GCGGTTCCGCGCGCCTTAAAGTCTCCGGCTGAGCAGTTCGTCTCTAAGCGTTGTGACATATATTTTCGCTGAAGAG  
TTCGGGCGGCTTTTGGCCGTTAAATCTTTCTTAAAGTTGACCTCGCGAGTGAAGCGCAACAGCTCAAATTTGAA  
ATCTGGCGCAAGCCCGAGTTGTAATTTGTAGAGGATGCTTCTGGCCAGCGGCCGTTCTAAGTTCTTGAACAG  
GACGTCATAGAGGGTGAGAATCCCGTATGTGACCGCGCGCAGCCTTTACGTAGCTCCTTCGACGAGTCGAGTTG  
TTTGGGAATGCAGCTCTAAATGGGAGGTAAATTTCTTCTAAAGCTAAATACCGGCCAGAGACCGATAGCCACAA  
GTAGAGTGATCGAAAGATGAAAAGCACTTTGGAAAGAGAGTTAAAAAGCACGTGAAATTTGTTGAAAAGGGAAGCGC  
TTGCAACCAGACTTCGTAGCGATGTTCCGCTGGTCTTTTTCGACCGGTCTACTCATCGTCGCGAGGCCAACATCGTC  
TGGCCCCGCTGGATAAGACCTAAGGAATGTAGCTTCCCTCGGGAAGTGTATAGCCTGTGGTGTGACGCGCGG  
TCGGGCGAGGTCGCGCTTCGGCAAGGATGTTGGCGTAATGGTTGTGACGCGGCCGCTTGAACAGCGACCAAG  
GAGTCTAACATCTATGCGAGTGTTCGGGTGTCAAACCCCTACGCGTAATGAAAGTGAACGGAGTGGGAAGCGCA  
AGCTGCACCATCGACCGATCCTGATGTCTCGGATGGATTTGAGTAAGAGCATAGCTGTTGGGACCCGAAAGATG  
GTGAACATATGCTTGAATAGGGTGAAGCCAGAGGAAAACCTCTGGTGGAGGCTCGCAGCGGTTCTGACGTGCAAAATC  
GATCGTCAAATTTGGGTATAGGGGCGAAAGACTAATC

>Fulvia fulva-CBS131901

TTTAGAGGAAGTAAAGTCGTAACAAGGTCTCCGTAGGTGAACCTGCGGAGGGATCATTACTGAGTGAGGGCTCA  
CGCCCGACCTCCAACCCCTCTGTGAACCAACTCTGTTGCTTCGGGGGCGACCCCGCCGTTTCGCGCAGCGCGCCCC  
CGGAGATCATCAAACACTGCATCTTTGCGTCGGAGTCTTAAAGTAAATTTAAACAAAACCTTTCAACAACGGATCT  
CTTGGTTCTGGCATCGATGAAGAACGCAGCGAAATGCGATAAGTAATGTGAATTGCAGAATTCAGTGAATCATCG  
AATCTTTGAACGCACATTGCGCCCCGTGGTATTCCGCGGGGCATGCCTGTTTCGAGCGTCATTTACCACCTCAACG  
CCTAGCTTGGTATTGGGCGTCGCGGTTCCGCGCGCCTTGAACGTCTCCGGCTGAGCAGTTCGTCTCTAAGCGTTG  
TGGCATATATTTTCGATAAAGAGTTTCGGGCGGCTTTGGCCGTTAAATCTTTTCAAAGGTTGACCTCGGATCAGGT  
AGGGATACCCGCTGAACTTAAGCATATCAATAAGCGGAAAAAGAAACCAACAGGGATGCCCCTAGTAAACGGCG  
AGTGAAGCGGCAACAGCTCAAATTTGAAATCTGGCGCAAGCCCGAGTTGTAATTTGTAGAGGATGCTTTCGGCCA  
GCGGCCGTTCTAAGTTCTTGGAACAGGACGTCATAGAGGGTGAGAATCCCGTATGTGACCGGTGCGCAGCCTTT  
ACGTAGCTCCTTCGACGAGTCGAGTTGTTTGGGAATGCAGCTCTAAATGGGAGGTAAATTTCTTCTAAAGCTAAA  
TACCGGCCAGAGACCGATAGCGCACAAAGTAGAGTGATCGAAAGATGAAAAGCACTTTGGAAAGAGAGTTAAAAAG  
CACGTGAAATTTGTTGAAAGGGAAGCGCTTGCAACCAGACTTCGTAGCGATGTTCCGCTGGTCTTCTGACCGGTCT  
ACTCATCGTCGCGAGGCCAACATCGTCTGGGACCGCTGGATAAGACCTAAGGAATGTAGCTTCCCGTCGGGAAGT  
GTTATAGCCTGTGGTGTGACGCGCTCGTTCGGGCGAGGTCGCGCTTCGGCAAGGATGTTGGCGTAATGGTTGC  
CAGCGGCCCGTCTGAAACACGGACCAAGGAGTCTAACATCTATGCGAGTGTTCGGGTGTCAAACCCCTACGCGTA  
ATGAAAGTGAACGGAGGTGGGAAGCGCAAGCTGCACCATCGACCGATCCTGATGTCTCGGATGGATTTGAGTAA  
GAGCATAGCTGTTGGGACCCGAAAGATGGTGAACATATGCTTGAATAGGGTGAAGCCAGAGGAAAACCTCTGGTGGAG  
GCTCGCAGCGGTTCTGACGTGCAAATCGATCGTCAAATTTGGGTATAGGGGCGAAAGACTAATCGAACCATCTAG  
TAGCTGGTTCTCGCCGAAG

>Dothiostroma septosporum-CBS128990

TTTAGAGGAAGTAAAGTCGTAACAAGGTCTCCGTAGGTGAACCTGCGGAGGGATCATTACTGAGTGAGGGCGAA  
AGCCCGACCTCCAACCCCTTTGTGAACCAACTCTGTTGCTTCGGGGGCGACCCCGCCGTTTCGCGCAGCGCGCCCC  
CGGAGGTTCATCAAACACTGCATCTTTGCGTCGGAGTCTTAAAGTAAATTTAAACAAAACCTTTCAACAACGGATCT  
CTTGGTTCTGGCATCGATGAAGAACGCAGCGAAATGCGATAAGTAATGTGAATTGCAGAATTCAGTGAATCATCG  
AATCTTTGAACGCACATTGCGCCCCGTGGTATTCCGCGGGGCATGCCTGTTTCGAGCGTCATTTACCACCTCAAGC  
CTGGCTTGGTATTGGGCGTCGCGGTTCCGCGCGCCTTAAAGTCTCCGGCTGAGCAGTTCGTCTCTAAGCGTTGTG

GCATATATTTTCGCTGAAGAGTTTCGGACGGCTTTTGGCCGTTAAATCTTTTACAAGGTTGACCTCGGATCAGGTAG  
GGATACCCGCTGAACTTAAGCATATCAATAAGCGGAGGAAAAGAAAACCAACAGGGATTGCCCTAGTAACGGCGAG  
TGAAGCGGCAACAGCTCAAATTTGAAATCTGGCGCAAGCCGAGTTGTAATTTGTAGAGGATGCTTCTGGCCAGC  
GGCCGTTCTAAGTTCTTTGGAACAGGACGTCATAGAGGGTGAGAATCCCGTATGTGACCGGCGCGCAGCCTTTAC  
GTAGCTCCTTCGACGAGTCGAGTTGTTTTGGGAATGCAGCTCTAAATGGGAGGTAAATTTCTTCTAAAGCTAAATA  
CCGGCCAGAGACCGATAGCGCACAAAGTAGAGTGATCGAAAGATGAAAAGCACTTTGGAAAGAGAGTTAAAAAGCA  
CGTGAATTTGTTGAAAGGGAAGCGCTTGCAACCAGACTTCGTAGCGATGTTCCGCCGGTCTTCTGACCGGTCTAC  
TCATCGTCGCGAGGCCAACATCGTCTGGGGCCGCTGGATAAGACCTAAGGAATGTAGCTTCCCTCGGGAAAGTGT  
ATAGCCTGTGGTGATGCAGCGTGTCTCGGGCGAGGTCGCGCTTCGGCAAGGATGTTGGCGTAATGGTTGTGACG  
GGCCCGTCTTGAACACCGACCAAGGAGTCTAACATCTATGCGAGTGTTCGGGTGTCAAACCCCTACGCGTAATG  
AAAGTGAACGGAGGTGGGAAGCGCAAGCTGCACCATCGACCGATCCTGATGTCTCGGATGGATTTGAGTAAGAG  
CATAGCTGTTGGGACCCGAAAGATGGTGAACATATGCCTGAATAGGGTGAAGCCAGAGGAAACTCTGGTGGAGGCT  
CGCAGCGGTTCTGACGTGCAATCGATCGTCAAATTTGGGTATAGGGGCGAAAGACTAATCGAACCATCTAGTAG  
CTGGTTCCTGCCGAAG

>Pseudocercospora fijiensis-CIRAD86

TTTAGAGGAAGTAAAAGTCGTAACAAGGTCTCCGTAGGTGAACCTGCGGAGGGATCATTACCGAGTGAGGGCTCA  
CGCCCGACCTCCAACCTTTGTGAACCACAACCTTGTGCTTCGGGGGCGACCTGCCGTGCGCGGGCGCCCCGGGA  
GGCCGTCTAAACACTGCATCTTTGCGTCGGAGTTTCAAACAAATCGAACAAAACTTTCAACAACGGATCTCTTGG  
TCTGGCATCGATGAAGAACCGCAGCGAAATGCGATAAGTAATGTGAATTCAGTAATTCAGTAATTCAGTAATCT  
TTGAACGCACATTGCGCCCTTTGGTATTCCGAAGGGCATGCCTGTTTCGAGCGTCATTTACCACCTCAAGCCGTC  
TTGGTATTGGGCGTCGCGGTTCTTCGCGCGCCTTAAAGTCTCCGGCTGAGCTGTCCGTCTCTAAGCGTTGTGGAT  
CTTTCAATTGCTTCGGAGTGCGGGTGGCCGCGGCGCTTAAATCTTTATTCAAAGGTTGACCTCGGATCAGGTAG  
GGATACCCGCTGAACTTAAGCATATCAATAAGCGGAGGAAAAGAAAACCAACAGGGATTGCCCTAGTAACGGCGAG  
TGAAGCGGCAACAGCTCAAATTTGAAATCTGGCGTAAGCCGAGTTGTAATTTGTAGAGGATGCTTCCGGGTAGC  
GGCCGGTCTAAGTTCTTTGGAACAGGACGTCATAGAGGGTGAGAATCCCGTACGTGACTGGCTTGCACCTCCAC  
GTAGCTCCTTCGACGAGTCGAGTTGTTTTGGGAATGCAGCTCTAAATGGGAGGTAAATTTCTTCTAAAGCTAAATA  
CCGGCCAGAGACCGATAGCGCACAAAGTAGAGTGATCGAAAGATGAAAAGCACTTTGGAAAGAGAGTTAAAAAGCA  
CGTGAATTTGTTGAAAGGGAAGCGCCGCAACCAGACTTTGCGGGCGGTGTTCCGGCCGGTCTTCTGACCGGTTTAC  
TCGCCCGCGTGAGGCCATCATCGTCTGGGACCGCTGGATAAGACCCGAGGAATGTAGCTCCCTTCGGGGTGTGTT  
ATAGCTCCTGGTGATGCAGCGCGTCCCAGGAGGTTCCGCGCTTCGGCAAGGATGATGGCGTAATGGTTGTGCGG  
GCGCCGTCTTGAACACCGGACCAAGGAGTCTAACATCTATGCGAGTGTTCGGGTGTCAAACCCCTACGCGTAATG  
AAAGTGAACGGAGGTGGGAACCTTTGGTGCACCATCGACCGATCCTGATGTCTCGGATGGATTTGAGTAAGAGC  
ATAGCTGTTGGGACCCGAAAGATGGTGAACATATGCCTGAATAGGGTGAAGCCAGAGGAAACTCTGGTGGAGGCTC  
GCAGCTATAATATATTAATAATCGAACCTAGCGAGATAGACGGCTATCTAGCCTATCGACCTATAACCCCTTATAA  
CCTTAGTA

>Zymoseptoria tritici-IP0323

TTTAGAGGAAGTAAAAGTCGTAACAAGGTCTCCGTAGGTGAACCTGCGGAGGGATCATTACCGAGCGAGGGCCTC  
CGGGTCCGACCTCCAACCTTTGTGAACACATCCCGTTGCTTCGGGGGCGACCTGCCGGGCGCCCCGGAGGAC  
CACCAAAAACACTGCATCTCTGCGTCGGAGTTTACGAGTAAATCGAAAACAAAATTTCAACAACGGATCTCTTG  
GTTCTGGCATCGATGAAGAACCGCAGCGAAATGCGATAAGTAATGTGAATTCAGTAATTCAGTAATTCAGTAATC  
TTTGAACGCACATTGCGCCCCCTGGTATTCCGGGGGGCATGCCCGTTCGAGCGTCATTACACCCTCCAGCCTCG  
CTGGGTATTGGGCGTCTTTTCGCGGGGGATCACTCCCCCGCGCCTCAAAGTCTCCGGCTGAGCGGTCTCGTCT  
CCCAGCTTGTGGCATCACGTCTCGCCGCGGAGTTTACAGGACCCCTACGGCCGTTAAATCACACCTCAGGTTGAC  
CTCGGATCGGTTAGGATACCCGCTGAACCTAAGCATATCAATAAGCGGAGGAAAAGAAAACCAACAGGATTGCC  
CTAGTAACGGCGAGTGAAGCGGCAACAGCTCAAATTTGAAATCTGGCCCCCGGCGGAGTTGTAATTTGTAGAG  
GATGCTTCTGGGTAGCGACCGGTCTAAGTTCTTTGGAACAGGACGTCATAGAGGGTGAGAATCCCGTATGCGACC  
GGCCCGCGCCCTCCACGTAGCTCCTTCGACGAGTCGAGTTGTTTTGGGAATGCAGCTCTAAATGGGAGGTAAATTT  
CTTCTAAAGCTAAATACCGGCCAGAGACCGATAGCGCACAAAGTAGAGTGATCGAAAGATGAAAAGCACTTTGGAA  
AGAGAGTTAAAAGCACGTGAAATTTGTTGAAAGGGAAGCGCTTACAACCAGACTTTGGGGCGGTGTTCCGCCGGT  
CTTCTGACCGGTCTACTCTCCGTCCCAGGCAACATCATCTGGGACCGCCGGACAAGACCTCAGGAATGTAGCT  
CCCCCTCGGGGGAGTGTATAGCCTGTGGTGATGCGGCGCGTCCCAGGTTGAGGTCCGCGCTTCGGCAAGGATGTT  
GGCGTAATGGTTGTGACGCGGCCGCTTTGAAACACCGACCAAGGAGTCTAACATCTATGCGAGTGTTCGGGTGTC  
AAACCCCTACGCGGAATGAAAGTGAACGGAGGTGGGAAGGGGCAACCCCTGCACCATCGACCGATCCTGATGTCC  
CGGATGGATTTGAGTAAGAGCATAGCTGTTGGGACCCGAAAGATGGTGAACATATGCCTGAATAGGGTGAAGCCAG  
AGGAAACTCTGGTGGAGGCTCGCAGCGGTTCTGACGTGCAATCGATCGTCAAATTTGGGTATAGGGGCGAAAGA  
CTAATCGAACCATCTAGTAGTCTGGTTCCTGCCGAAG

>Aspergillus niger-CBS513.88

TTTAGAGGAAGTAAAAGTCGTAACAAGGTTTCCGTAGGTGAACCTGCGGAAGGATCATTACCGAGTGCGGGTCCCT  
TTGGGCCAACCTCCCATCCGTGTCTATTGTACCCTGTTGCTTCGGCGGGCCCGCCGCTTGTGggccgcccggggg  
ggcgccctctgccccccgggcccgtgcccgcgggAGACCCCAACACGAACACTGTCTGAAAGCGTGCAGTCTGAGT  
TGATTGAATGCAATCAGTTAAAATTTCAACAATGGATCTCTTGGTTCCGGCATCGATGAAGAACCGCAGCGAAAT  
GCGATAACTAATGTGAATTCAGTAATTCAGTGAATCATCGAGTCTTTGAACGCACATTGCGCCCCCTGGTATTCC  
GGGGGCGATGCCTGTCCGAGCGTCATTGCTGCCCTCAAGCCCGGCTTGTGTGTTGGGTCCCGTCCCCCTCTCCG

GGGGGACGGGCCC GAAAGGCAGCGGCGGCACCGCGTCCGATCCTCGAGCGTATGGGGCTTTGTCACATGCTCTGT  
AGGATTGGCCGGCGCCTGCCGACGTTTTCCAACCATTCTTTCCAGGTTGACCTCGGATCAGGTAGGGATACCCGC  
TGAACCTAAGCATATCAATAAGCGGAGGAAAAGAAAACCAACCGGGATTGCCTCAGTAACGGCGAGTGAAGCGGCA  
AGAGCTCAAATTTGAAAGCTGGCTCCTTCGGAGTCCGCATTGTAATTTGCAGAGGATGCTTTGGGTGCGGCCCC  
GTCTAAGTGCCCTGGAACGGGCCGTGAGAGAGGGTGAGAATCCCGTCTTGGGCGGGGTGTCCGTGCCCGTGTA  
GCTCCTTCGACGAGTCGAGTTGTTTGGGAATGCAGCTCTAAATGGGTGGTAAATTTTCATCTAAAGCTAAATACTG  
GCCGGAGACCGATAGCGCACAAAGTAGAGTGATCGAAAGATGAAAAGCACTTTGAAAAGAGAGTTAAACAGCACGT  
GAAATTGTTGAAAGGGAAGCGCTTGCAGACCAGACTCGCCCGGGGTTTCAGCCGGCATTCGTGCCGGTGACTTC  
CCCGTGGGCGGGCCAGCGTCGGTTTTGGGCGGCCGGTCAAAGGCCCTGGAATGTAGTGCCCTCCGGGGCACCTTA  
TAGCCAGGGGTGCAATGCGGCCAGCCTGGACCGAGGAACGCGCTTCGGCACGGACGCTGGCATAATGGTCGTAAA  
CGACCCGTCTTGAACACGGACCAAGGAGTCTAACATCTACGCGAGTGTTCCGGTGTCAAACCCGTGCGCGCAGT  
GAAAGCGAACGGAGGTGGGAGCCCCCTTGCGGGGCGCACCATCGACCGATCCTGATGTCTTCGGATGGATTTGAG  
TAAGAGCGTAGCTGTGGGGACCCGAAAGATGGTGAACATATGCCTGAATAGGGCGAAGCCAGAGGAAACTCTGGTG  
GAGGCTCGCAGCGGTTCTGACGTGCAAATCGATCGTCAAATTTGGGTATAGGGGCGAAAGACTAATCGAACCATC  
TAGTAGCTGGTTCCTGCCGAAG
