# Supplementary material for: Novel Introner-Like Elements in fungi Are Involved in Parallel Gains of Spliceosomal Introns
Source: PubMed Central journal article supplement (PMC4457414; doi:10.1371/journal.pone.0129302), 2015-06-05
Supplement: pone.0129302.s002.pdf [file pone.0129302.s002.pdf]

## S2 File. Sequences amplified by PCR.

Oligonucleotide sequences are highlighted in yellow. When two several introns were amplified, they are underlined. The presence of AA in the sequence name indicates that the PCR fragment was cloned before sequencing.

```
>Fulful-cf01-AA30 (cf01019)
CTGAAGGGTGCTAGGCATCTTCGCGTGTCTGAGACAACCTGCTGACCTTGTACCCCTTTGCTTTT
>Fulful-cf01-AA31 (cf01001-02-03-04-05-11-22)
CTGAAGGGTGCTAGGCATCTTCGCGTGTCTGAGACATCTGCTGACCTTGTACCCCTTTGCTTTT
>Pasmiu-cf01-AA32 (inserted in Fulful186212)
AGGGTGCTAGGCATCTTCGCTTGTCTCAGGCATCTGATAACCTTGGACCCCTTTGCTTTTAGGTATAGTGGCGAGA
ACATGCGTCTGGAGACGATCGGTCTACTGTTTACAACAACAGCCACTGCATGCCTTCTTGGTTTGGCACGCGATG
ATGATAAACACACGGAATTTGTAGAAGCGATGTATCGAGGCAGCACAACTGCCTACACCTCGTAAGTAAATCGG
AGGGTTCTAGGCACCTTTACATTTCTCAGACACCTACTGACCTTGTACCCCTTTGCTTTT
>Pasmiu-cf01-AA33
CTGAAGGGTGCTAGGCATCTTCGCGTGTCTGAGACATCTGCTGACCTGGTACCCCTTTGCTTTT
>Passmi-cf01-AA35
CTGAAGGGTGCTAGGCATCTTCGCTTGCCTTAGATATCTGCTGACCTTGTACCCCTTTGCTTTT
>Pasmic-cf01-AA36
CTGAAGGGTGCTAGGCATCTTCGCTCGCTCGCCTGTCTAAGAAGACATCCGCTGACCTTGTACCCCTTTGCTTTT
>Pasmic-cf01-AA37
CTGAAGGGTGCTAGGCATCTTCGCTTGTCTAAGACATCCGCTGACCTTGTACCCCTTTGCTTTT
>Pasbra-cf01-AA40
CTGAAGGGTGCTAGGCATCTTCGAGTGTCTCACACGTTTGCTAACCTTGTACCCCTTTGCTTTT
>Pasper-cf01-AA42
CTGAAGGGTGCTAGGCATCTTCGCTTGTCTTAGACACCTACTGACCTTGTACCCCTTTGCTTTT
>Pasper-cf01-AA43
CTGAAGGGTGCTAGGCATCTTCGCTTGTCTTAGACATCTACTGACCTTGTACCCCTTTGCTTTT
>Zymtri-cf01-AA44 (Zymtr43394 from 5'UTR to 2nd intron, mg01020)
CTGAAGGGTGCTAGGCATCTTCGAACTTACCTTGCCCTCATCTACCTCCACGTCCTTCCAGCACTCAAC
TTCGCAGCTGGAGTCTTACCATAACCAACATGTTCTTCTCCAAATTCGTTTCCATCGCGACGGTGTGGTCGCC
AGCGGGCAAGCTCTCCAAGCTTGAAGATCGCCAGTCCGGCTGTCCGCCAATCCACATCTTCGGCGCGCGCGAG
ACGACAGCATCGCCAGGCTTTGGAACCGCAGGCGTCTTCATCAATCTCATCGTAGGCGCATATCCCTCGGCCACC
ACGGAGGCGATCAACTATCCAGCCACTGGTGGAGACTCTTATGGCAGTTCAATGAGGACTGGTGTGGCCAACATC
GCCAACCAGATCAATTCTTTCAACCAGAGATGCCCTCAGGCAAAGCTCGTCGTCGTCGGGTATTCGCAGGTATGT
CCTTTGGCAGAGGTGGTGTGTGTGTGTGCTTCTCATCCATCAGAGCTGACGATATCCAGGGCGCGCAAATCTCCG
ACAATGCCATCTGCGGCGGCGGAGACCCGAATCAAGGTAAGAAACCGAAGTGCAGAAGGCCCTCCATTTGCCAAGA
CTGTCTCGGACGCCAGGCTTCCATCCATGCTTCAAGTCTACGACATCCGCTGACCTTGTACCCCTTTGCTTTT
>Zymtri-cf01-AA45 (mg01022)
CTGAAGGGTGCTAGGCATCTTCGCGTGTCTGAGACATCTGCTGACCTTGTACCCCTTTGCTTTT
>Pasbra-cf01-11-7-2 (inserted in Clafu193200)
CTGAAGGGTGCTAGGCATCTTCGCATGTCTCAGACGTATACTGATGTTGATTGCCTTGCTTTTAGTCATTCTCGG
AAAGTTCATTATTGCTGCGGTGCGGTCACGAACGGCTACGTAGGTGCTGAGTGGCATATCGGGTTTCCAGTCGT
TAGCAGATATGTGTGGGCATCTATGGGTTTCGATCACCTCATCACATGCTTGCACACAGCAGACTGACCTAGTGG
CACAGACACTACGTTGCCCTGGTGCAGCGTGTGATACTTCTCTGGTATGGTTTCGACAGTACAGTCCCTGGACGGGC
GGTCTTTGCGTTCAGAACATCTTGGCTGCCATCTTCCCTTCGTACCAGAACATGGGCGACGCTTCCCAGGCTCG
GCCAACATGAATGCCAAACAATGTAAGTAAACCGAAGGGTCTTGCCACCCTCGAATGTCGAGACATCTGCTGA
CCTTGTACCCCTTTGCTTTTAG
>Fulful-cf0203-AA57 (cf02001)
GGGCGGAAGGCATCATCTGTCTGGAACATGCGCGCAGCATCCCTAGCTTAGTCGCGGTTGCTGAGACAATGCCAC
GTGGTGTTCGAGTATGGCTAACACCCTTCTGTTTC
>Fulful-cf0203-AA58 (cf02015 + downstream RSI)
GGGCGGAAGGCATCATCTGTCTGACACATGCGCGCGGCATCCCCAGCTTAGTCGCGTTCGCTGAGACATTGCCAC
GTGGTGTTCGAGTATGACTGACACCCCTTCTGTTAGGTTTCACTTCTAGTAAGGGCCTCGTTCCTACTACAGTCCC
AGACACTGCCATGTGGTTCTCGAGTATAGCTAACACCCTTCTGTTTC
>Fulful-cf0203-AA59-REV (cf02004)
GGGTGGAAGGCATCATCTGTCTGGAACATGCGCGCGGCATCCCTAGCTTAGTCGCGGTTGCTGAGACAATGCCAC
GTGGTGTTCGAGTATGGCTAACACCCTTCTGTTTC
>Pasmiu-cf0203-AA60-REV
```

GGGTGGAAGGCATCGTCTCTATGAGACATGCGCACAGCACCTCCACTTTATTGGCACTTGCTGAGACACTGCCAC  
GTGGTTCTCGAGCATGGCTAACACCCTTCTGTTTC  
>Pasmu-cf0203-AA61-REV (inserted in Zymtr43851)  
GGGCGGAAGGCATCGTCTGTTACGATCGTCCGCGCCTCACTCCCTGCTGGACATCAGTGGATGAGACATCGCCA  
CATGCTGCTCGAGTATAGCTAATGCTTTTCTTCGGTAGTCGCCAAGACCTCCATGACTGTTTGAAGCAGGTCGCC  
ACTTCGTCGGATCGGCCTGGTCCGCCAGCTGTTGTCCGCGTTTTTCAGCAAAGTTGTGTCTTGCCAATGCGAGGCT  
GGGATCGTCCAGCTGGACAACGGCGAGGAACCTTGAGGCAGACCTCATTGTCGGAGCGGATGGTATCCACAGCGTT  
CTGCGGGACTGCGTCTCTCAGAAGGCTCCAAGCCGATCCCGACAGGCCTCTCTGCCTATCGACTAATGTTGCCA  
AGCGCGGTCAATCAAAGGGACGCACCCGAGTTCTGTGCCAACGTCGATCCACGAGAACCCTACACCTCAATGATC  
ATGGCGACCAATGCCGTCTGATCATGGGACCGGCTAGAAACGGCGAGCTCTATAGTCTTGTGGCTTGGTACCA  
GATGACCAGATGAATGAAGATCCGAACAGCAAACAATCGTGGGTGTGAAGGGGAGCATCAACAAAATGCTTGAC  
ACTTACCAAGAGTTTCCCCACTGGATAAAGTCACTCCTTACGGCCGCAAATCAACAAGACATTGGACTGTGGCAA  
CTTCGAGACATTGAGCCCTTGCAGACCTGGTATAAAGGCAAGGTTATTCTCATCGGCGACGCTGGTAAGTGC  
GAA  
GCGTGGGCAGCATTGGCTGGAATACGCGCGCTACCCTCGCGCTCAGCACGAGCTGCTGAGACCTGTCCGTTCCT  
GCTCGAACATAGCTAACACCCTTCTGTTTC  
>Passmi-cf0203-AA62-REV  
GGGTGGAAGGCATCGTCTGTCTTATACGTGCCCCGCGCTCCCCCCCCCTCTTTAGCACCTCCAGCGGAGACATTGC  
CACGTAGTGTTCGAGTATGGCTAACACCCTTCTGTTTC  
>Pasmic-cf0203-AA63  
GGGCGGAAGGCATCGTCTGTCTTAGACGTGCCCCGAGGCTCACTCCCGTCTCAGCACACCAGCTGAGACACTGC  
CACGTGGTGTTCGAGTATGGCTAACACCCTTCTGTTTC  
>Amyafr-cf0203-AA65  
GGGCGGAAGGCATCGTCTGTCTGAGACCTGCACGCGGCATCTCCAGCTCAGCAGTAGTTGCTAAGACATTGCTAC  
GTGGTGTTCGAGTATGGCTAACACCCTTCTGTTTC  
>Pasbra-cf0203-AA66-REV  
GGGTAGAAGGCATCGTCTGTCTGAGACATGCGCGCGGCATCTCCAGCTCAATAGCCACTGCTGAGACATTGCCAC  
GTGGAGTTCGAGTATGGCTAACACCCTTCTGTTTC  
>Pasdal-cf0203-AA67-REV  
GGGCGGAAGGCATCGTCTAACCAAGAAATGCGCGCCGATCTCCGACTCGTCAGCAGCTGCTGATACATTGCCAC  
GTGGTTCTCGAGTATAGCTAACACCCTTCTGTTTC  
>Dotsep-cf0203-AA68-REV (ds05015)  
GGGCGGAAGGCATCGTCTGTCTTGCCATGCCCCGCGCCGATCCATTGCCACAGCAAATACCAAGACTTCCCC  
CGTGGTTCTCGAGTATGGCTAACACCCTTCTGTTTC  
>Pasper-cf0203-AA69-REV  
GGGTGGAAGGCATCGTCTGGCTCAGACATGTAACCTGCGTCCCCCTTTGATAAGGCAGTTGCCGAGACACTGCC  
ACATAATGTTTCGAGTATGGCTAACACCCTTCTGTTTC  
>Pascap-cf0203-AA70-REV  
GGGTGGAAGGCATCGTCTGAGACATGGCTTCCCGCCTCCAGCCCAGCAACTGCTGCTGAGACATTGCCACGTGGT  
ATTTCGAGTATAGCTAACACCCTTCTGTTTC  
>Fulful-cf0203-14-1-6-33 (cf02012 and cf07001 in Fulful189536)  
GGGCGGAAGGCATCGTCTGTCTGGAACATGCGCGCGCATTTCCAGCTTACTCGAGGCTGCTGAGACATTGCCAC  
GTGGTGTTCGAGTATGGCTAACACCCTTCTGTTTCAGGGATTTCGACAAGCTCAGTGCCAATCTCTTTACCCTAGT  
ATTAATGTTAATCACCCTCAGAGCGGAAGGATGCAGATTACCTGTTCCACAAGGGCAGCGCGAAGGAGCG  
CTAACAGTTAGTGTCAACCTCCGTCAGAGTGCCCTTTTCTGTTGCTACTGTAAGGTTACTAGGCATCGGGCAG  
TGGCTTAGACCACAATGGAGGGTGCAAGACATGCGCTGCACGACGCGCTCTCTTACCATTTACTACTACAGTCTA  
AGACACCGCCACGTGGTTCTCGAGTATGGCTAACACCCTTCTGTTTC  
>Pasmu-cf0203-14-2-2-33-FW  
CATCGTCTCTATGAGACATGCGCACAGCACCTCCACTTTATTGGCACTTGCTGAGACACTGCCACGTGGTTCTCG  
AGCATGGCTAACACCCTTCTGTTTC  
>Pasmu-cf0203-14-2-2-35-REV  
GGGTGGAAGGCATCGTCTGTCTAGAACATGTCCGCACCTCACTCCTCTTACAGCATCACCAGCTGAGACATTGCTA  
CGTGGTGTTCGAGTATGGCTAT  
>Pasbra-cf0203-14-7-3 (inserted in Dotse59237)  
GGCGGAAGGCATCGTCTGTCTGAGACATGCGCGCTGCATCTCCAGCTCAGTAGCCGCTGCCGCGATATTGCTACG  
TGGAGTTTCGAGTATGGCTAACACCCTTCTTCCAGGCTCACCACAACTCTCCCTCGGATGCGACGCCACATCC  
AGGACTGCCACTCCTGGTCTTGGCCCAGAACCTTGGCCTGGATGGTCAACAAGTTTCGAGGGTGATACCTCCCTG  
ACACGCAATGACTACTTCACTGCTGGTGGTGTAAGTAAATCCGAAAGGGCAGAACATCGTCTCGAGACAC  
GCGCGCAGCATATTAGCTCGATAGCCGCTGCTGAGACATTGCCACGTAAGTGCAGTATGGCTAACACCCTTCT  
GTTTCA  
>Fulful-cf04ds03-10-1 (cf04005)  
CCTAGGGAGTACATACAGTTGTGGCGGAGCTAGCAGTGTCTCAAACTGCTCACTTGTCTAATACGCACGACAAT  
GCGCGCAACAGTAGGCCCTATAGGGTCGTGCTGAGAGAGA  
>Amyafr-cf04ds03-10-6-41-REV  
CCTAGGGAGTACATACAGTTGTGGCCAGGCTAGGCAACGCTCATAGCGTGGCGTAAGCGTCTAGACAC
