# Supplementary material for: Novel Introner-Like Elements in fungi Are Involved in Parallel Gains of Spliceosomal Introns
Source: PubMed Central journal article supplement (PMC4457414; doi:10.1371/journal.pone.0129302), 2015-06-05
Supplement: pone.0129302.s003.pdf [file pone.0129302.s003.pdf]

### **S3 File. DNA and protein alignments built to determine intron landscapes.**

Alignments were performed using Muscle as described in the materials and methods section. Exonic sequences from *Passalora* species were aligned to the previous DNA alignment using Muscle and new alignment was manually edited in GeneDoc. All names are as described in Figure 3 and S4 File.

DNA alignments: introns are highlighted in yellow. Four-level shade indicates nucleotide conservation over 90%, 80%, 60%, and under 60%. In D, two-level shade indicates nucleotide conservation over and lower than 65%. In B, insertion of a single nucleotide in the sequence of *Lentfl* makes it a pseudogene.

Protein alignments: positions of RSIs, previously identified ILEs and novel ILEs are indicated in yellow, orange and red, respectively. For novel ILEs, the position is indicated within the sequence of the two most closely related fungal species. Numbers indicate phase 0, 1 or 2. Numbering of intron positions in Figure 3 corresponds to the position in the corresponding alignment below, minus the number of upstream intron positions. Four-level shade indicates amino acid identity of 100%, over 80%, over 60%, and under 60%.

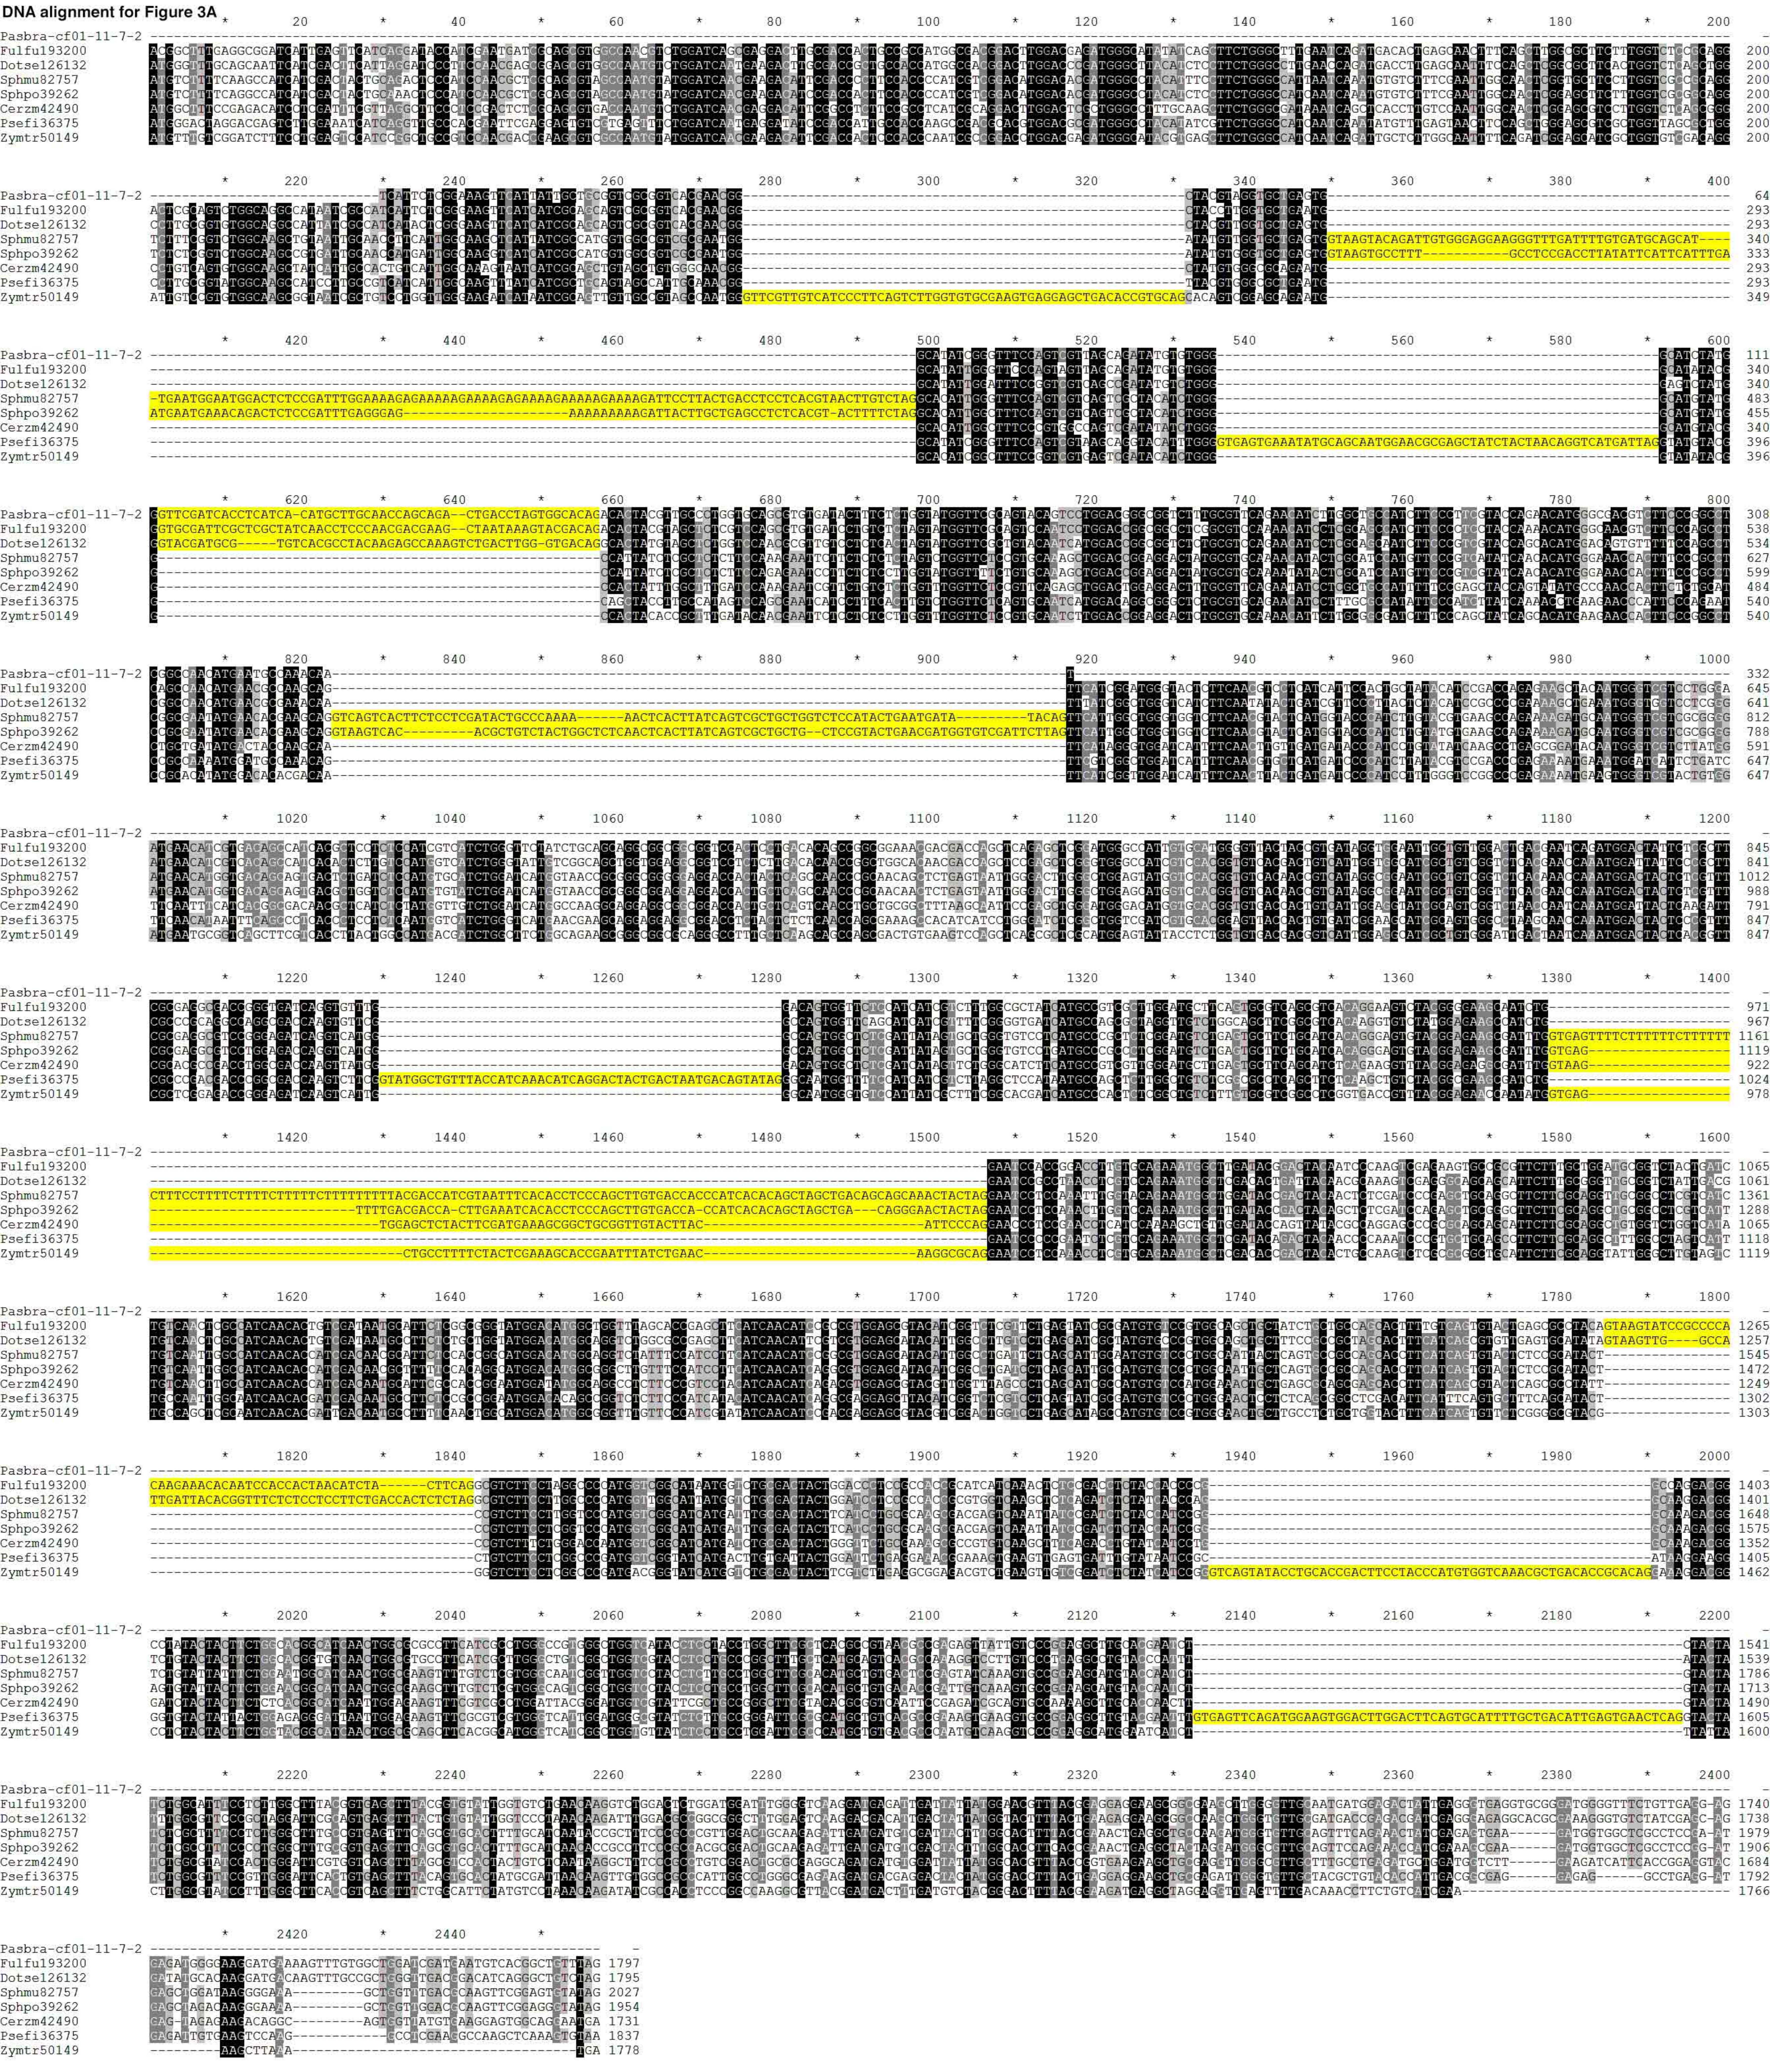

Protein alignment for Figure 3A

Fulfu193200 -----MTLSNFQLGASLVSAGLAVWQAVIAA1IILGKFIIAAVAVTNG-YLGAE-WHIGFPVVSRYVW-GIYGOHYVALVQRVILSLVWFHAVQSWTGGLGVQNIILAAIFPSYQNMGNVFPASANMNAKQ1FIGWVLFNVLIIPLLYIRPEKIQVW 143  
Dotse126132 MGLQQFIDFIRIPSNERSVANVWINEIDLRLPPWRRTWTRWAYISFWAINQMTLSNFQLGASLVSAGLAVWQAVIAA1IILGKFIIAAVAVTNG-YVGAE-WHIGFPVVSRYVW-GVYGOHYVALVQRVVLSLVWFHAVQSWTGGLCVQNIILAAIFPSYQHMDSVFPASANMNAKQ1FIGWVIFNIIIVPILLYIRPEKIKVW 194  
Sphmu82757 MSFCAIIDYCRSPNARSVANVWINEIDLRLPPHRRTWTRWAYISFWAINQMCLSNWQLGASLVAAGLSVWQAVIA-TFIGKLIIAMVAVANG-YVGAE2WHIGFPVVSRYIW-GMYG-HYIALFQRILLSLVWFSVQSWTGGLCVQNIILASMFPSYQHMGNHFPASANMNTKQ0FIGWVVENVIMVPIIYVKPEKMQVW 194  
Sphpo39262 MSFCAIIDYCKLPSNARSVANVWINEIDLRLPPHRRTWTRWAYISFWAINQMCLSNWQLGASLVAAGLSVWQAVIA-TMIGKVIIAMVAVANG-YVGAE2WHIGFPVVSRYIW-GMYG-HYIALFQRILLSLVWFSVQSWTGGLCVQNIILASMFPSYQHMGNHFPASANMNTKQ0FIGWVVENVIMVPIIYVKPEKMQVW 194  
Cerzm42490 MAFRDILDVRLPSDSRSVTNVWINEIDLRLPPHRRTWTRWAFASFWAINQLTLSNWQLGASLVSAGLSVWQAVIA-TVIGKVIIAMVAVANG-YVGAE-WHIGFPVVSRYIW-GMYG-HYIALIQRIVLSLWFSVQSWTGGLCVQNIILAAIFPSYQYMPNHFASADMTTKQ-FIGWVIFNLIIMPIIYIKPERIQVW 194  
Psefi36375 MGLGRVLEIIRLPTNSRSVVSEFWINEIDLRLPPSRRTWTRWAYISFWAINQICLSNFQLGASLVSAGLAVWQAVIA-VIIGKFIIAAVAIANG-YVGAE-WHIGFPVVSRYIW1GMYG-SYLAIVQRILLSLVWFSVQSWTGGLCVQNIILCAIFPSYQNLKNPFESAKMCAKQ-FVGVWIFENVIMIPILYVVRPEKMKWI 194  
Zymtr50149 MFVGSFLESIRLPSNDRSVANVWINEIDLRLPPNRRTWTRWAYVSWFAINQIALGNFQLGASLVSTGLSVWQAVIA-VLVGKIIIAVAVANG0TVGAE-WHIGFPVVSRYIW-GIYG-HYIALIQRILLSLVWFSVQSWTGGLCVQNIILAAIFPSYQHMKNHFPASAHMDTRQ-FIGWVIFNLIIMPIIYVVRPEKMKVW 194  
Glotr82366 --MESGLRFLQVHSSGDE-TSVWINDIRPLPPSRRTWDKIAFISFWAINQIALSNWQGTGSSLVAVGLSVWQTMIA-VIVAKIISLVAIYNG-YVGAE-WHIGFPVVSRYVW-GVYG-SYLSLILQRILLSLVWFSVQSWTGGLCITAIISSEIFPSYQHMGNTMFASTHMTTKQ-FVGVWVYVNVVTVEMLYIPPEKTKRL 191

Fulfu193200 VLGMINIVTAITLLSIVIWVLSAAGGGGPLLTPAETTTSSSELGWAIIVHGVTTVIGGIAVGLTNQMDYSRFARRPGDQVF-GQWFSIIVFGAIMPVSLGCFASASQEVYGEAI-WNPPDLVQKWLDTDYNPKSRSAAFFAGCGLLICQLAINTVDNAFSAAGMDMAGLAPSEFINIRRGAYIGLVLSIAMCPWQLLSAASTFV 341  
Dotse126132 VLGMINIVTAITLLSMVIWVLSAAGGGGPLLTPAGTTTSSSELGWAIIVHGVTTVIGGIAVGLTNQMDYSRFARRPGDQVF-GQWFSIIVFGVIMPALGCLAASASQGVYGEAI-WNPPNLVQKWLDTDYNKSRRAAFFAGCGLLTCQLAINTVDNAFSAAGMDMAGLAPSEFINIRRGAYIGLVLSIAMCPWQLLSAASTFI 392  
Sphmu82757 VAGNMVTAITLLISMCIWIMVTAGGGGPLLSPATALLSNWDLGWSMVHGVTTVIGGIAVGLTNQMDYSRFARRPGDQVM-GQWLSIIVLGVIMPALGCLASASQGVYGEAI2WNPPNLVQKWLDTDYNRSRRAAGFFAGCGLVIICQLAINTVDNAFSTGMDMAGLFPSEFINIRRGAYIGLILSIAMCPWQLLSAASTFI 392  
Sphpo39262 VAGNMVTAITLLISMCIWIMVTAGGGGPLLSPATTLLSNWDLGWSMVHGVTTVIGGIAVGLTNQMDYSRFARRPGDQVM-GQWLSIIVLGVIMPALGCLASASQGVYGEAI2WNPPNLVQKWLDTDYSSRRAAGFFAGCGLVIICQLAINTVDNAFSTGMDMAGLFPSEFINIRRGAYIGLILSIAMCPWQLLSAASTFI 392  
Cerzm42490 VLWFNFITAITLLISMVWIMAKAGGGGPLLSPAAALSSELGWMVHGVTTVIGGIAVGLTNQMDYSRFARRPGDQVM-GQWLSIIVLGVIMPVSLGCLASASQKVYGEAI2WNPPNLIQKLLDTSYTPGARAAFFAGCGLVIICQLAINTVDNAFATGMDMAGLFPSEFINIRRGAYVGIALS IAMCPWKLLSAASTFI 392  
Psefi36375 ILIFNIISALTLLSMVIWVMNEAGGGGPLLSPAKATSSWDLGWSIVHGVTTVIGGIAVGLSNQMDYSRFARRPGDQVF1GQWFSIIVLGSIMPALGCLGASASQAVYGEAI-WNPPNLVQKWLDTDYNPKSRAAFFAGFGLVICQLAINTVDNAFSAAGMDTAGLFPSEFINIRRGAYIGLVLSIAMCPWELLASASTFI 392  
Zymtr50149 VLWMNAVSVFTLLAMTIWLLAEGAGPLLKQFATVKSSSALAWSITSGVTTVIGGIAVGLTNQMDYSRFARRPGDQVI-GQWVSIIFAGTIMPFLGCLCASASVTVYGEPI2WNPPNLVQKWLDTDYTAKSRAAFFAGIGLVVCQLAINTVDNAFSTGMDMAGLFPSEFINIRRGAYVGLVLSIAMCPWELLASAGTFI 392  
Glotr82366 FIVMNVISFFTLLISMMIWALSQAAGGGGPLLSPAAVSSSELGWAIIVSGITTVIGGIAVGLTNQFDYSRFARKPGDQIF-GQWFSIIFFGTIMPFLGCLTSASVAIYGEAL-WNPPDIVLQKWLDTDYTAKSRAAFFAGVGLVVCQLAINTVDNAFSAAGMDLAGLFPKYINIRRGAYIGLVLSIIMQWQLLSAAGTFI 389

Fulfu193200 SVLSAY1SVFLGPMVGIMVCDYWTLRHRRIKLSLDLYHP-GQDGLYYFWHGINWRAFAIAWAVGWSYLLPGFAHAVTFRVIVPEACTN-LYYLAFPLGFVSTVYWCINQVWTLDDGFGVKDEIDYYGTFTEEEAAKLGVAMMETIEGEVDRDGVSVFEEEMGKDEKFFVAGSMNVTAV 512  
Dotse126132 SVLSAY1SVFLGPMVGIMVCDYWILRHRVVKLSLDLYHP-GKDGLYYFWHGVNWRFAFAIAWAVGWSYLLPGFAHAVTPKVLVPEACTH-LYYLAFPLGFVSTVYWSLNKIWTAGFGVKDDIDYYGTFTEEEAAKLGVAMTETIEGEARERVSIEQDMHKDDKFAAGLTDIRAV 563  
Sphmu82757 SVLSAY-SVFLGPMVGIMICDYFILRKRVRKLSLDLYHP-GKDGLYYFWNGINWRSEFVSWAIGWSYLLPGFAHAVTFSIKVPEACTN-LYYLAFPLGFVSTVYHFCINTAFPPVGLQEIDDVDYFGTFTEETEAAMGVAVSETIESEDGGSPNLDKGG----AGLTQVRSV 558  
Sphpo39262 SVLSAY-SVFLGPMVGIMICDYFILRKRVRKLSLDLYHP-GKDGVYYFWNGINWRSEFVSWAVGWSYLLPGFAHAVTPIVKVPEACTN-LYYLAFPLGFVSTVYHFCINTAFPPRGLQEIDDVDYFGTFTEETEAATRMGVAVPETIESEDGGSPNLDKGG----AGWTQVRRV 558  
Cerzm42490 SVLSAY-SVFLGPMVGIMICDYWVLRKRVRKLSLDLYHP-GKDGIYYFESHGINWRSEFAWITGWSYSLPGFVHAVNSEIAVPEACTN-LYYLAFPLGFVSTVYHFCINTAFPPVGLREADDVDYFGTFTEGEEAARLGVALPEMLDGLDHSPEVRVEKTG----SGYVKEWQE 558  
Psefi36375 SVLSAY-SVFLGPMVGIMTCDYWILRKRVRKLSLDLYNP-HKEGVYYYWRGINWRSEFASWVIGWAYLLPGFAHAVTFSIKVPEACTN2LYYLAFPLGFVSTVYHAIKLVPPFGLGKDDDEDYFGTFTEEEAARLGVAATLYTIDGEER--PEDEIVKSK----ASKAKLV- 555  
Zymtr50149 SVLGAY-GVFLGPMVGIMVCDYFVLRKRVRKLSLDLYHP1GKDGLYYFWYGINWRSEFAWVIGWCYLLPGFAHAVTENVKVPPEAWNH-LYYLAFPLGFVSTVYHAIKLVPPFGLGKDDDEDYFGTFTEDEARRLSFDKPSVIEKLV----- 537  
Glotr82366 SVLSAY-SVFLGPMVGMQVCDYWLVGRKIKLSLDLYSS-SPEGIYYYSRGNWRAFAAWIVGWASQIPGFVNAVNEDIKVPVGSQH-LYYLAFPAGEFCISELVFYALNRLAPFAGLGEVDDVDYFGTFDEEEADKMGIRPAEDSDSSGADVEVDEKRLDL----ERTVSVDKL 555



Protein alignment for Figure 3B

FulfuScf7180000127656:32617-28874  
Dotse59237  
Sphmul65575  
Aciril12790  
Zasce69443  
Lentfl317754  
Didex5051  
Parno1819  
Pleli10338  
Pyrtt5397  
Pyrtr150011  
Altbr3820  
Curlu106279  
Bipmall64970  
Bipso346574  
Bipor91811  
Bipvil05691  
Bipzel01154  
Phlgi131735

20 40 60 80 100 120 140 160 180 200

-----MVGDRDFAEMKRADRLVARI-----PGDAASCF-FNPDHKGAEFYSKPYFCGAK-NGAPGYQICANNKVPADLDTAHRFIAPCPNDIRG-P-CPGL-NT-AAN-HG-FLSRDGIIVTFAELTDTQQNVYGVGYDLAVLLAV-LGVGLDGD2PI-TTKLSLGCDATSRT 151  
-----MVDDRDFAEMKRADDLVARQ-----PGDAASCF-FNSKHKGAEFYSKPYFCGAK-NGAPGDQACANNLVFAK1GDTAHQFMAPCAEDIRG-P-CPGL-NT1AAN-HG-FLSRDGIIVTFAELTCAQQNVYGVGYDLAVLLAV2LGVGLDGD2PI-TTKLSLGCDATSRT 151  
-----MDPVEMAERLALVVRQ-----APGSNVCF-FNPDHRGAVFENPKPYFCGAQ-NGAPGFQICANNRVFAROGDTAHAYQAPCPNDIRG-P-CPGL-NT-AAN-HG-FLSRDGIIVTFAELTCAQQNVYGVGYDLAVLLAV-LGVGLDGD-PI-TTKLSLGCDATSRT 148  
-MLKRFLLAGLIASQGYAFPWVARHVRDPEMKASNRNLSRRTYPGAGTGYGDYDGESEATCF-YNADHVFAAANPKPYFCGAR-DGLPGYQVCKNNQVFAPOGDTAHQYQAFSSDIRG-P-CPGL-NT-AAN-HN-FLARDGITTEVELVDAQQNVYGVGYDLAVLLAV-LGVGLDGD-PIGIEKMSIGCDATSRT 188  
MPQNSIFTALLWTGFAAGYPWVVDHAALDPRRVDNRQLRLRQ-----SPSAANCF-NPNHTGAVPYSDPYFCGAR-NGKPGSTRCVGNIVFAPOGDNHYFVFPFLDIRG2F-CPGL-NV-AAN-HN-FLSHDGIITNTELILAQQNVYGVGYDLAVLLAV-LGVGDGD-PLGTTKLSIGCDATSRT 176  
MKSFSLLIILSQVPSIIAWPWIANVPGVDSLAMHAHPENFAKQRRQ-----TGLDPTCF-FNPDHTGAAFDPOQPYTGSIDGLPGTGV-GGVQVFA-P-GDTAHEFTAPCPNDIRG-F1CPGM-NT-AAN-HN0FLSHDGIITNLAELVSAQQNLYNLHFDIATFIAV-RGIALDGD-VV-TTKLSIGCDATSRT 177  
-MQTSLLL-LSASAVSAYPWVANQPGVDSSLPRNRNV-----KRQDNCF-FNSNHQPAAPYNSQPYTGAR-NGARGTGK-GGIKVPAD-GDTAHAFQAPCPNDIRG-P-CPGL-NA-AAN-HN-FLARDGITTEVELVDAQQNLVNDWDIATLLAT-LGVVADGD-IL-TGKLSIGCDATSRT 167  
-MTEDRLTA-----LSTPITNQPLRTTFASPT-----FARGTVQDELGK-----GGIRVFAH-GDTAHAFKAPTSKDIRG-P-CPGL-NA-AAN0HN-FLARDGITTEVELMDAQQNLVNVYDLALILAV-LGVVQDGD-II-TGKLSIACDATSRT 132  
-MLTLPSSL-LFASSAAAFPWVAGSPGVDSLRFREAREAVT-----QKRQACE-FNANHQFAAPYAPTYVYGAK-NGRPGTGK-GGIKVPAD-GDTAHRFVPEPKDIRG-P-CPGL-NA-AAN-HN-FLAHDGVVTEVELVDAQQNVYGVGYDLAVLLAV-LGIEAGGD-VV-TGKLSIGCDATSRT 172  
-MHSLSLL-LQASFATAYPWVAGETGVNSGLFRQARQV-----EKRQENCF-YNPFVHKGAAPTYAPTYAGAK-NGVPCNGK-GGIKVPAD-GDTAHAYTEPCPNDIRG-P-CPGL-NA-AAN0HN-FLSHDGIITNFEIVDMQQNVYVNGYDLSVLLTV-LGIQAGGD-VV-TGKLSIGCDATSRT 168  
-MHALSLL-LQAPFAAAYPWVAGEPGVNSGLFRQARQA-----EKRQENCF-FNPVHKGAAPTYAPTYVYGAK-NGLPCNGR-GGIKVPAD-GDTAHAYTEPCPNDIRG-P-CPGL-NA-AAN0HN-FLSHDGIITTEVELVDAQQNVYVNGYDLAVLLAV-LGVQAGGD-VL-TGKLSIGCDATSRT 168  
-MHALSIVL-LQASAAYVWVSGQPGVNSGLFRQARAV-----EKRQANCF-FNPVHKGAAPTYAPTYVYGAK-NGVPSQK-GGIKVPAD-GDTAHAYTEPCNDIRG-P-CPGL-NA-AAN0HN-FLSHDGIITNCELVDAQQNVYVNGYDLAVTLAV-LGIQAGGD-VI-SGRLSIGCDATSRT 168  
-MHVLPPLV-IHATSIVAFPWIGTPPGVSSSFFKDAHTV-----GKRQEKCF-FNPVHKGAAPTYEPYTYTGAK-NGHPSQI-GGIKVPAD-GDTAHAFTEPCPNDIRG-P-CPGL-NA-LAN0HN-FLSHDGIITNCELVDAQQNVFNVDLSDILHAV-LGIQAGGD-PI-TGRLSIACDATSRT 168  
-MYILPILLSIYVTSTVAEPWIANQPGVNPISIFRNAHPV-----EKRQENCF-FNPDHKGAAPTYEPYTYTGAK-NGVPCNQR-GGIKVPAD-GDTAHAYTEPCPNDIRG-P-CPGL-NA-LAN0HN-FLSHDGIITNCELVDAQQNVFNVDLSIVHTV-LGMQAGGD-FI-TGRLSIACDATSRT 169  
-MYILPILLSIHVTSTVAEPWIGNQPGVNPISIFRNAHPV-----EKRQENCF-FNPHHKGAAPTYEPYTYTGAK-NGAPCNQR-GGIKVPAD-GDTAHAYTEPCPNDIRG-P-CPGL-NA-LAN0HN-FLSHDGIITNCELVDAQQNVFNVDLSVHTV-LGMQAGGD-FI-TGRLSIACDATSRT 169  
-MYILPILLSIHATSTVAEPWIGNQPGVNPISIFRNAHSV-----EKRQEKCF-FNPDHKGAAPTYEPYTYTGAK-NGAPCNQR-GGIKVPAD-GDTAHAYTEPCPNDIRG-P-CPGL-NA-LAN0HN-FLSHDGIITNCELVDAQQNVFNVDLSIVHTV-LGMQAGGD-FI-TGRLSIACDATSRT 169  
-MYILPILLSIHAASTVAEPWIGNQPGVNPISIFRNAHPV-----EKRQENCF-FNPDHKGAAPTYEPYTYTGAK-NGAPCNQR-GGIKVPAD-GDTAHAYTEPCPNDIRG-P-CPGL-NA-LAN0HN-FLSHDGIITNCELVDAQQNVFNVDLSVHTV-LGMQAGGD-FI-TGRLSIACDATSRT 169  
-MYILPILLSIHAASTVAEPWIGNQPGVNPISIFRNAHPV-----EKRQENCF-FNPDHKGAAPTYEPYTYTGAK-NGAPCNQR-GGIKVPAD-GDTAHAYTEPCPNDIRG-P-CPGL-NA-LAN0HN-FLSHDGIITNCELVDAQQNVFNVDLSVHTV-LGMQAGGD-FI-TGRLSIACDATSRT 169  
-MARFNLIALL-----PWITFALAFPRPIMNTLSK-----RRAVLQEGARLSRRAAAPTAAQFFYGGAKIDGLPGSQQ-GGFQVFA-P-GDTAHAFQSPFAGAERG-P-CPGL-NT-MAN0HG-FLSRDGIITTEDELVAAQQNAFNIAVDLAVLLAT-LGVALDGD-II-TEKVSIGGDAIART 161

FulfuScf7180000127656:32617-28874  
Dotse59237  
Sphmul65575  
Aciril12790  
Zasce69443  
Lentfl317754  
Didex5051  
Parno1819  
Pleli10338  
Pyrtt5397  
Pyrtr150011  
Altbr3820  
Curlu106279  
Bipmall64970  
Bipso346574  
Bipor91811  
Bipvil05691  
Bipzel01154  
Phlgi131735

220 240 260 280 300 320 340 360 380 400

-ATP---G-LGPELGLDGNKFEAGDTSLTRNDYFT-AGG0DNFKENNTIYTDI---INNYCKDQ---CN-RDHVALYRKARYDWSVQH-NGNFYFGPK-SVLLFGAASSFL-YELFPSLGEF-GTANPTIMS-YFF-----QK-EQLPPN-WFSRVDPYSPILVAEIIHAYQYLHEV-AFGGNTGAP-NTFV 314  
-ATP---G-LGPELGLDGNKFEAGDTSLTRNDYFT-ANG0DNFKENNTIYTDI---INNYCKDN---CG-RAHIAKYRKARYDWSLNH-NGNFYFGPK0SLLLYGAASFL-YELFPSLGEF-GTANPTIMS-YFF-----QK-EELPPN-WFSRVDPYTIPDVANEIIHAYQYELYEV-AFGGNTGKPN-NTFV 314  
-ATP---G-LGPEGLLSTENKFEAGDTSLTRNDYFL-ANG-DNFRFNRTLYNMI---SQTGGGL---HN1RENIALYRFQRYQOQLNE-NGNFYFGPK-SVLLFGAASFL-YELFPSLGGF1GTPDQTIMD-FFF-----IK-EQLPPN2WFSRVDPYTIPLIAEIIHAYQYFLHEV-AFGGNTGKPN-NTFV 310  
SSSE---G-TTNELGLDGNKFEAGDTSLTRNDYFLADG-DNYSEFNQTLFNMSDAD---GN---FD-LTALANYRYQRYQOQLSE-NGNFYFGVK-SVLLFGAASFL2YELFPSLGEF-GSPNCAIMD-SYF-----QK-EELPPN2WFSRVDPYTLLDVADQINCMYAAHEV-AFGGNTGSP-NSFV 351  
SSTG---F---SEFGLNGH1KFEAGDSSLTRNDYFLIDNG-DNYSEFNSSLYEMSEVARSVSNGI---EN-RKALATYFAQRHAQSIHE-NGNFYEDPK-SVLLYGAAATFL2YELFPSGGPS-GVADQTIMN-YFF-----LQ-EQLPPN-WFSRSEKFSLLDVVTEIILAMYQEDFV-FEGANAGVP-DSEV 341  
SIDFTG-T-LGREPGLNANFKFEAGDSSLTRNDYFL-NNG-DAFTFQGMFADMYRVANETSNGV---FD-RDTISVYRSRRYDESVAE-NPNFYFGPK-ALLLYGAASFL-YEVEVFGPE-GLANFDIVS-TEYGAV---PNDSGSYDHP-ERIPEN-WFNRAAYGLLEIGNEIIHAYQYGRFVK-LFGGNVG-A-GNEL 357  
ATLG---GVLGRQFGLNGH1KFEAGDSSLTRNDYFT-NHG-DNYSEFNGLFKRMKDVADRVSNG---FD-RNTLAAYRSQRYDESVAE-NGNFYFGPL-ALLLYGAASFL-YELFASYGPE-GTADLKIIS-SFEGTTQDSN--GNWQAGP-ERIPDN-WFNRTSYTNNDVTEIILAQYVQYVK-LFGGNVG-T-NNED 346  
AALGGLNL-LGRQFGLNLSRFEADSSLTRNDYFT-HGG-DNYSEFNGLFARMKEVADRVSNG---FD-QKAMAAYRSQRYDESVAE-NGNFYFGPL-AILLYGASSFV-YELFAPYG---GQADIASVS-SFEGTTQDSN--GEWQHTA-ERIPDG-WHNRYPYTTASGVTEIILAQYLAYPK-FFGGNG-P-NNEN 311  
ALLP---I-LGRQFGLNTRKFEADSSLTRNDYFL-NNG-DNYSEFNGLFASMKSVADRVSNG---FD-LNALAAYRSQRYDESVAE-NDNFFFGPL-SVLLYGAAATFL-YELFPSYGPE-GVADLTKM-SFFGAVEDLSAPGGWRHVA-EQIPSN-WFNRRSPYSHVNTTQTILAMYAQYVK-LFGGNVG-K-KNEN 352  
ALLP---L-LGRQFGLNGH1KFEADSSLTRNDYFT-SNG-DNYSEFNGLFANMKNVADRVSNG---FD-RNALAAYRSQRYDESVAE-NDNFFFGPL-SVLLYGAAATFL-YELFPSYGPE-GTADLTKM-SFFGAVEDLSAPGGWRHVA-EQIPSN-WFNRRSPYSHVNTTQTILAMYAQYVK-LFGGNVG-K-KNEN 352  
ALLP---L-LGREPGLNGH1KFEADSSLTRNDYFT-SGG-DNYSEFNGLFANMKNVADRVSNG---FD-RNTLSVYRSQRYDESVAE-NGNFYFGPL-SVLLYGAAATFL-YELFPSYGPE-GTADLTKM-SFFGAVEDLSAPGGWRHVA-EQIPSN-WFNRRSPYSHVNTTQTILAMYAQYVK-LFGGNVG-K-KNEN 352  
ATLP---L-LGKQFGLNGH1KFEADSSLTRNDYFT-ANG-DNYSEFNGLFQAQKAVADKVSNG---FD-RNALAAYRSQRYDSDVQENASEFFFGPL-SVLLYGAAATFL-YELFPSYGDK-GVPDIAITM0SFFGAVEDSSAPGGWRHVP-ERIPEN-WFSRVEPYNNPDVTEIIVALYIKYK0LFGGNVG-K-NNED 348  
AFSE---L-LGRQGLNANFKFEADSSLTRNDYFL-ADG-DNYSEFNGLFQAQKAVADEVSGK---FD-RNALAKYRSRYDSDVANONPNFFSPY-SLILYGAAAFI-YELFPSHGK-GTPDLETK-SFFGAVEDPSAPGGWRHVP-ERIPEN-YVSRVQPYTVPLAAGEIILAMYLYQYVK-LFGGNVG-T-NNEN 348  
ALLP---A-IARQFGLNANFKFEADSSLTRNDYFL-ADG-DNYSEFNGLFQAQKAVADEVSGK---FD-RNALAKYRSRYDSDVANONPNFFSPL-AIILYGAAAFI-YELFPSYGNK-GTPDLETK-TFFGAVEDPSAPGGWRHVP-ERIPEN-WFSRVEPYTVPLAAGEIILAMYLYQYVK-LFGGNVG-T-NNEN 349  
ALLP---A-IARQFGLNANFKFEADSSLTRNDYFL-ADG-DNYSEFNGLFQAQKAVADEVSGK---FD-RNALAKYRSRYDSDVANONPNFFSPL-AIILYGAAAFI-YELFPSYGNK-GTPDLETK-TFFGAVEDPSAPGGWRHVP-ERIPEN-WFSRVEPYTVPLAAGEIILAMYLYQYVK-LFGGNVG-T-NNEN 349  
ALLP---A-IARQFGLNANFKFEADSSLTRNDYFL-ADG-DNYSEFNGLFQAQKAVADEVSGK---FD-RNALAKYRSRYDSDVANONPNFFSPL-AIILYGAAAFI-YELFPSYGNK-GTPDLETK-TFFGAVEDPSAPGGWRHVP-ERIPEN-WFSRVEPYTVPLAAGEIILAMYLYQYVK-LFGGNVG-T-NNEN 349  
ALLP---A-IARQFGLNANFKFEADSSLTRNDYFL-ADG-DNYSEFNGLFQAQKAVADEVSGK---FD-RNALAKYRSRYDSDVANONPNFFSPL-AIILYGAAAFI-YELFPSYGNK-GTPDLETK-TFFGAVEDPSAPGGWRHVP-ERIPEN-WFSRVEPYTVPLAAGEIILAMYLYQYVK-LFGGNVG-T-NNEN 349  
AALGALQGL-LGPEGLLDTENTFEADTSLTRNDYFL-ANG-DNYSEFNGLFAMTETVASTSSTDDPLYD-RTGIALYRFQRYQOQSRAE-NEHFFYFGPK-ATHIYGAAASFL-YCAFPSQANN-LKPLKATMM-SFFGAVEFAAGEFAFGFQ-ERFPDN-WFNRETPYTILEIATEIILAQYLAHEV-LFGGNVG-P-DDFD 348

FulfuScf7180000127656:32617-28874  
Dotse59237  
Sphmul65575  
Aciril12790  
Zasce69443  
Lentfl317754  
Didex5051  
Parno1819  
Pleli10338  
Pyrtt5397  
Pyrtr150011  
Altbr3820  
Curlu106279  
Bipmall64970  
Bipso346574  
Bipor91811  
Bipvil05691  
Bipzel01154  
Phlgi131735

420 440 460 480 500

GIGELGPSISNSSINGN-----AAGVVCILYQ-IATENTESAIGGG---TLSSQSAQWAAKMLNPIHGGNGT--AAQFGCPLNYNNA----- 391  
GIGQYGPSISNSSFNGT-----AAGIACILYQ-FATENAPSSLGGG---TLSSQSAQWAASKLNPIHSGNGT--AAQYSCPIFNNA----- 391  
GVGTQGPYISNNTIPGS-----FAGVACILYQ-IATENIPSAIGGGGAANDAIPASSINEMRNTLNPIHTNSSLSGAAAFGCPHVTGTAS----- 394  
GFGETGFTTSSSTFNGT---TAAGTACILYQ-IATGSIAGELGGD---VTPAANYAASKLNPLIAGLDELVGTCPLNYSNN----- 432  
GIGTSGITTSNSTKAT-----FAGIACILYQ-IITENIEAGGGSN---VPLARLAWVNVNINPIHGLGT--LGSIACPILVTV----- 416  
AINTTFGIIQNGTLPDE---VTAKDFVCILYQ-LAVDNVPGTVANEAE---ELPLQVITWVLTQLNPIHQNNG---CPIKIT----- 428  
ALSSPFGVIRDGKLPLA---ATASDLLCILYQ-LGTQPVFSSLSVVT---TLPLSLNWSVGLNPIHFKNAG-----CALRPDQTAPIA----- 423  
ALN--FGVIRDGKLPDS---ATAGDILCILYQ-LATSQVENTLTGVL---ALPINLVKWSASKLNPIHFDNAG-----GALAPL----- 380  
ALPGAIGLADGKLPTE---ATESDLLCILYQ-LGTGVVFASLSTVT---DITGSLNFGVAKLNPIHVRNVG-----CALKPDQTFPGN----- 429  
ALGTPFNVIKDGILPSS---AKLECFILYQ-LATSPVFGMLSTVT---DITGSLNDFALAKLPIHFKNTG-----CLVKSQGGSSGGGLIGLLNG 432  
ALSTPFDIKNGKLPST---ANLGCFLYQ-LATGVPVSMSTVT---DITGALLDFALTKLNPIHFKNTG-----CPLKSQGGSSGGGLLDGLLNG 432  
ALSTPFDIKVDGKLPD---VTAAQATCILYQ-LGVMAVSTLSTVT---DITDAVDFGVGLNPIHFKNAG-----CPIMVS----- 419  
ALNTPFGIVRDGRLPDG---VTAKDLMCILYQ-LTVSPLFGVLGPVG---DLTDAVINFAFSKLNPIHFAFNNSG-----CPLRIN----- 419  
ALSTPFDIKVDGKLPDE---VTVKLMMCLYQ-LAVSPVGMFGAVT---DITGAVINFAFSKLNPIHFAFNNTG-----CPLKVG----- 420  
ALSTPFGIKVDGKLPDE---VTVKDVLCLYQ-LAVSSVGMFGAVT---DIAGAVINFAFSKLNPIHFAFNNTG-----CPLRVG----- 420  
ALSTPFDIKVDGKLPDE---VTVKLMMCLYQ-LAVSPVGMFGAVT---DITGAVINFAFSKLNPIHFAFNNTG-----CPLRVG----- 420  
ALSTPFGIKVDGKLPDE---VTVKDLMCLYQ-LAVSPVGMFGAVT---DVTGAVINFAFSKLNPIHFAFNNTG-----CPLRVG----- 420  
ALSTPFGIKVDGKLPDE---VTVKDLMCLYQ-LAVSPVGMFGAVT---DVTGAVINFAFSKLNPIHFAFNNTG-----CPLRVG----- 420  
ALGA-FGIISNGQGGNGSTISANDVACILYQVFAFEAVPDSVSGLL---TLPIELNWIITKILPLSQGLG-----CPIATNS----- 423



Protein alignment for Figure 3C. The image shows a multiple sequence alignment of various protein sequences. The sequences are labeled on the left with identifiers such as Zasce60808, Cerzm65622, Zymtr43851, Lopma596116, Pyrtr157321, Curlu123898, Bipma1034928, Bipso218368, Bipor28457, Bipvi84790, Bipze101753, Pengl219443, Aspve124547, Aspwe173916, Penca5982, Penfe431082, Penbi454008, Penbr34900, Penca423940, PENCH69724, Colgr10528, Colgl11931734, Colfi1350467, Melva566401, Psean79378, and Psehu1241. The alignment is presented in a grid format with columns representing amino acid positions. Asterisks (\*) are placed above the alignment to indicate conserved regions. The alignment is split into two main sections, with the first section covering positions 1-200 and the second section covering positions 220-400.

Continuation of the protein alignment for Figure 3C. This section shows the alignment for amino acid positions 220 to 400. The same sequence identifiers as in the first section are used on the left. The alignment continues in a grid format, with asterisks (\*) marking conserved regions. The alignment is split into two main sections, with the first section covering positions 220-300 and the second section covering positions 320-400.

Continuation of the protein alignment for Figure 3C. This section shows the alignment for amino acid positions 420 to 480. The same sequence identifiers as in the previous sections are used on the left. The alignment continues in a grid format, with asterisks (\*) marking conserved regions. The alignment is split into two main sections, with the first section covering positions 420-440 and the second section covering positions 460-480.

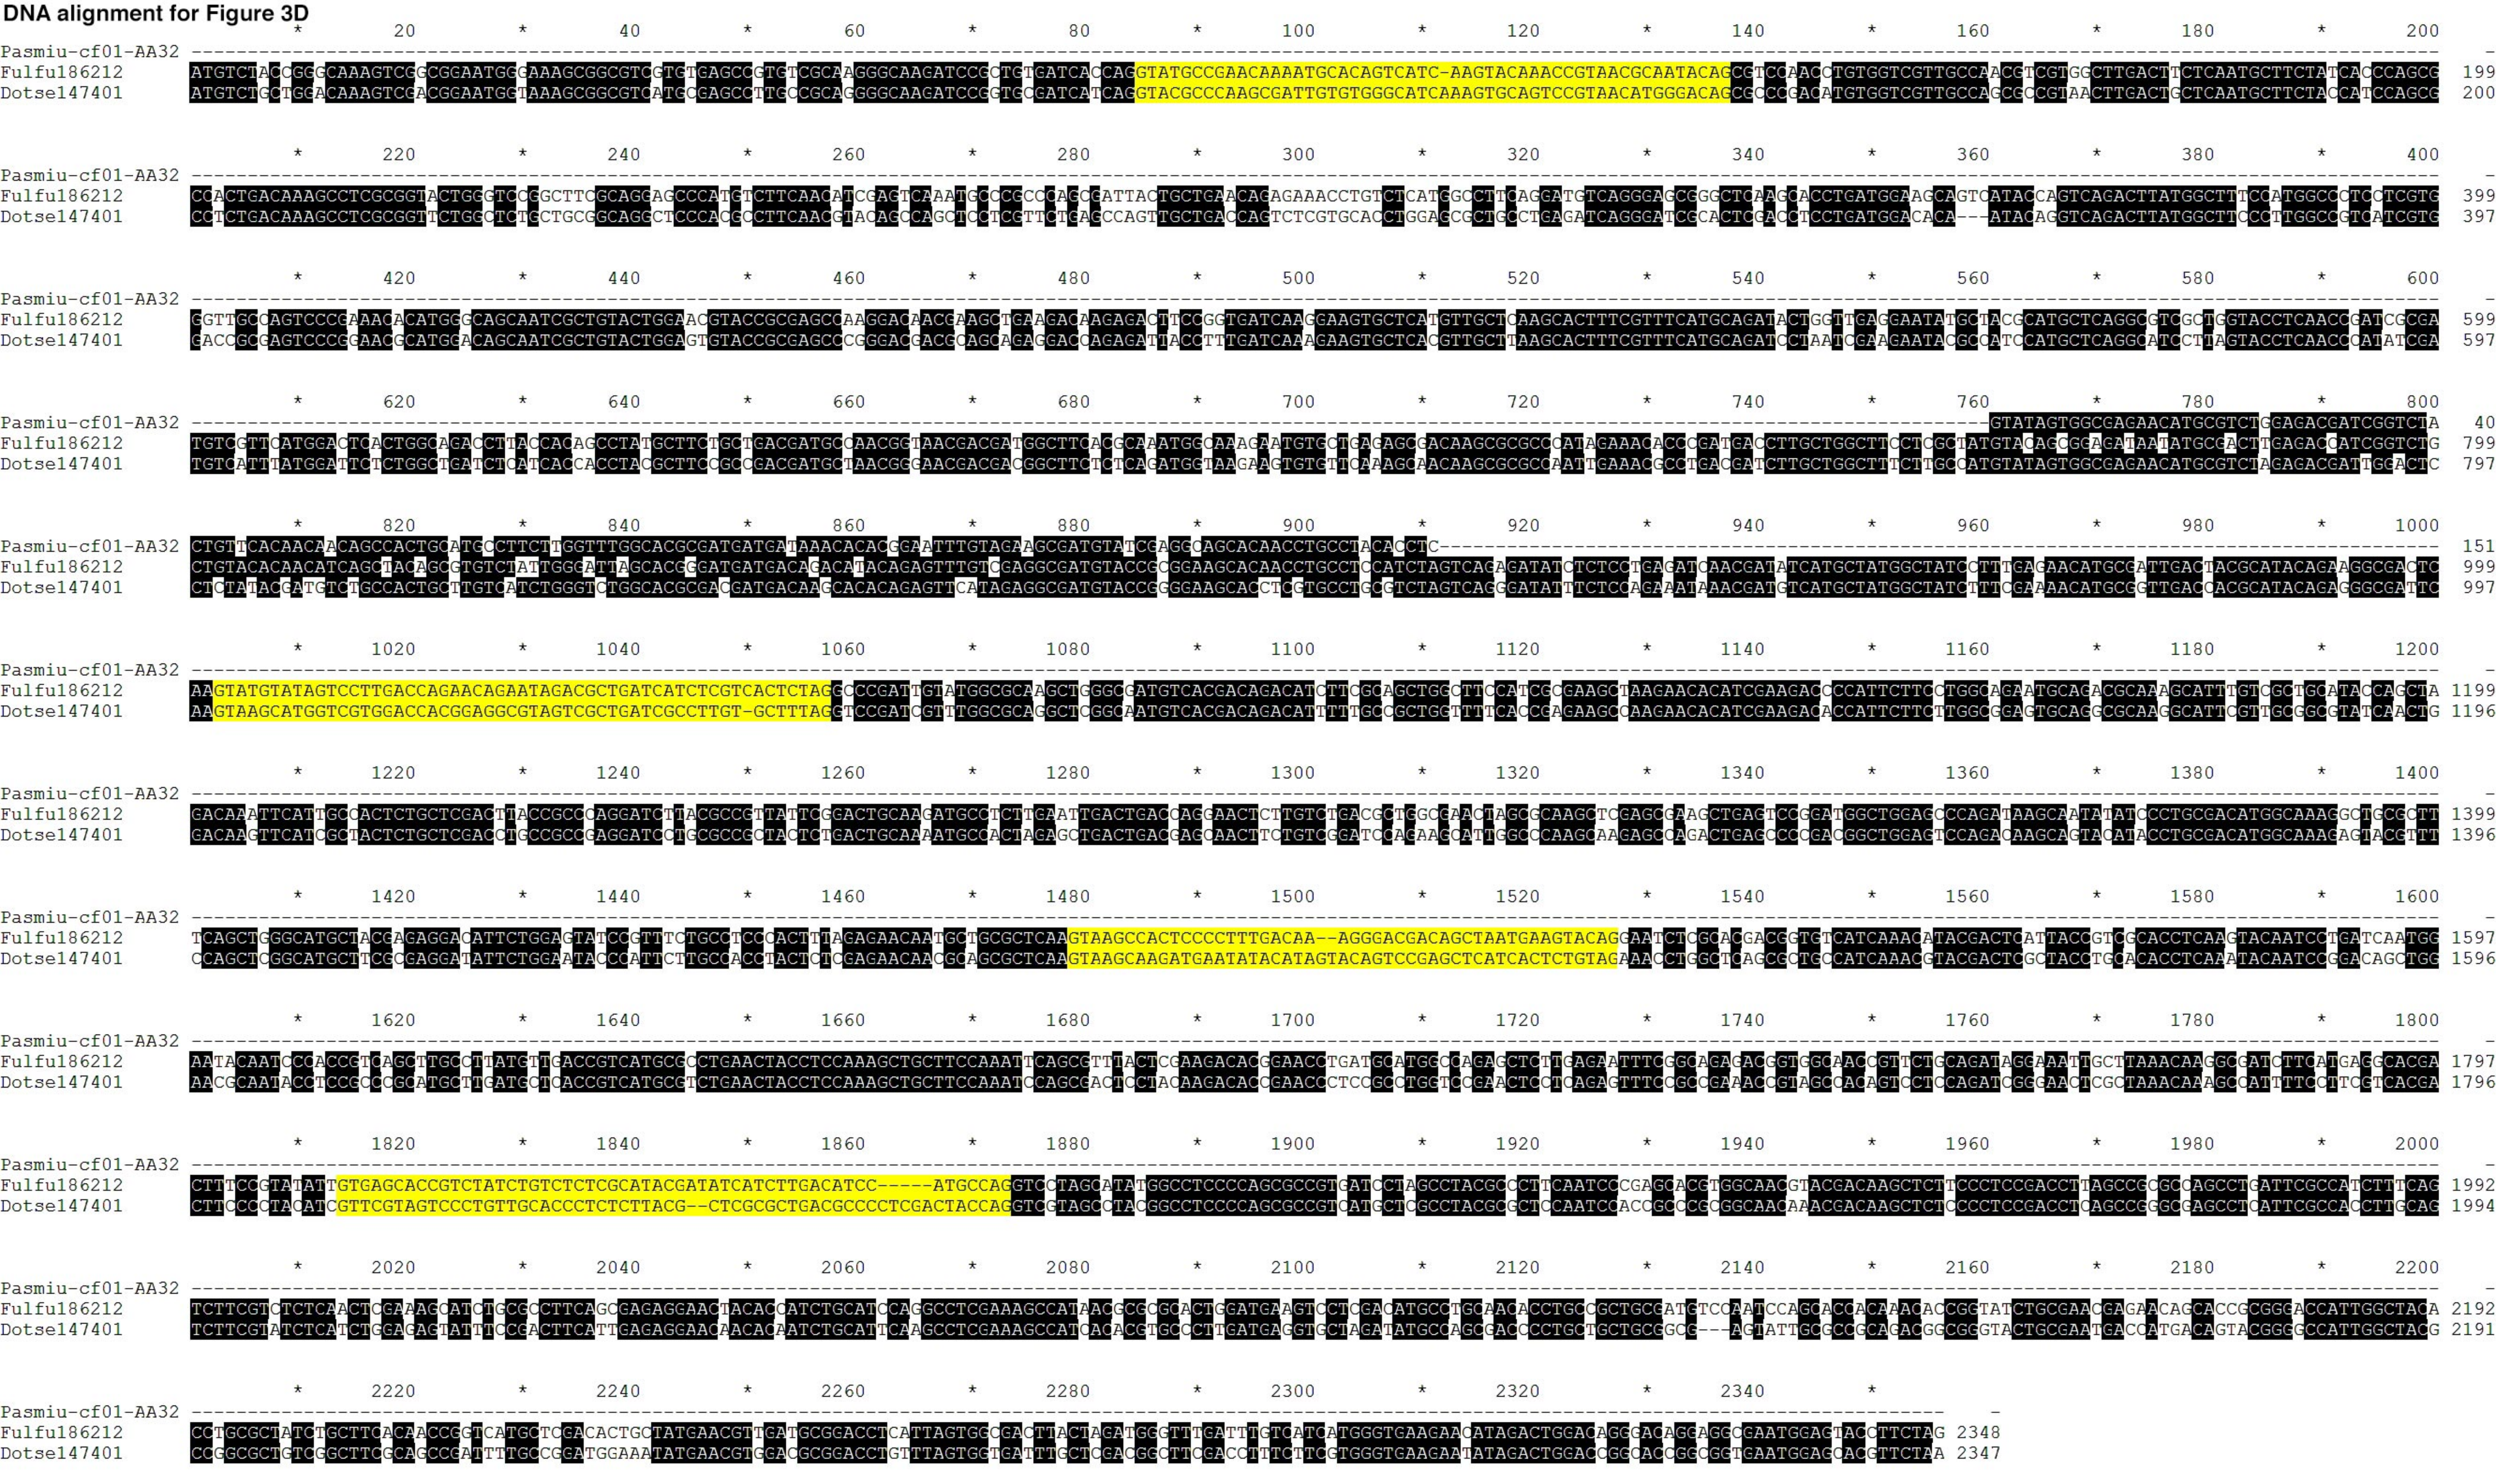



# Protein alignment for Figure 3D

|             | * | 20 | * | 40 | * | 60 | * | 80 | * | 100 | * | 120 | * | 140 | * | 160 | * | 180 | * | 200 |   |   |   |   |   |   |   |   |   |   |   |   |   |   |   |   |   |   |   |   |   |   |   |   |   |   |   |   |   |   |   |   |   |   |   |   |   |   |   |   |   |   |   |   |   |   |   |   |   |   |   |   |   |   |   |   |   |   |   |   |   |   |   |   |   |   |   |   |   |   |   |   |   |   |   |   |   |   |   |   |   |   |   |   |   |   |   |   |   |   |   |   |   |   |   |   |   |    |   |   |   |   |   |   |   |   |   |   |   |   |   |   |   |   |   |   |   |   |   |   |   |   |   |   |   |   |   |   |   |   |   |   |   |   |   |   |   |   |   |   |   |   |   |   |   |   |   |   |   |   |   |   |   |   |   |   |   |   |   |   |   |   |   |   |   |   |   |   |   |   |   |   |   |   |   |   |   |   |   |   |
|-------------|---|----|---|----|---|----|---|----|---|-----|---|-----|---|-----|---|-----|---|-----|---|-----|---|---|---|---|---|---|---|---|---|---|---|---|---|---|---|---|---|---|---|---|---|---|---|---|---|---|---|---|---|---|---|---|---|---|---|---|---|---|---|---|---|---|---|---|---|---|---|---|---|---|---|---|---|---|---|---|---|---|---|---|---|---|---|---|---|---|---|---|---|---|---|---|---|---|---|---|---|---|---|---|---|---|---|---|---|---|---|---|---|---|---|---|---|---|---|---|---|----|---|---|---|---|---|---|---|---|---|---|---|---|---|---|---|---|---|---|---|---|---|---|---|---|---|---|---|---|---|---|---|---|---|---|---|---|---|---|---|---|---|---|---|---|---|---|---|---|---|---|---|---|---|---|---|---|---|---|---|---|---|---|---|---|---|---|---|---|---|---|---|---|---|---|---|---|---|---|---|---|---|---|
| Fulfu186212 | M | S  | T | G  | Q | S  | R | R  | N | G   | K | A   | A | S   | C | E   | P | C   | R | K   | G | K | I | R | C | D | H | Q | R | P | T | C | G | R | C | Q | R | R | G | L | T | S | Q | C | F | Y | H | F | A | P | L | T | K | P | R | G | T | G | S | G | F | A | G | A | H | V | F | N | I | E | S | N | A | R | F | A | I | T | A | E | Q | R | N | L | S | H | G | L | Q | D | V | R | E | R | A | Q | A | P | D | G | S | S | H | T | S | Q | T | Y | G | F | P | W | P | S | S | W | V | A  | S | P | E | T | H | G | Q | Q | S | L | Y | W | N | V | P | R | A | K | D | N | E | A | E | D | K | R | L | P | V | I | K | E | V | I | M | L | L | K | H | F | R | F | M | Q | I | L | V | E | E | Y | A | T | H | A | Q | A | S | L | V | P | Q | P | I | A | M | S | F | M | D | S | L | A | D | L | T | T | A | Y | A | S | A |   |
| Dotse147401 | M | S  | A | G  | Q | S  | R | R  | N | G   | K | A   | A | S   | C | E   | P | C   | R | R   | G | K | I | R | C | D | H | Q | R | P | T | C | G | R | C | Q | R | R | N | L | T | A | Q | C | F | Y | H | F | A | P | L | T | K | P | R | G | S | G | S | A | A | A | G | S | H | A | F | N | V | Q | P | A | P | R | S | E | P | V | A | D | Q | S | R | A | P | G | A | L | P | E | I | R | D | R | T | R | F | P | D | G | H | N | - | T | G | Q | T | Y | G | F | P | W | P | S | S | W | T | A  | S | P | G | T | H | G | Q | Q | S | L | Y | W | S | V | P | R | A | R | D | A | E | D | Q | R | L | P | L | I | K | E | V | L | T | L | L | K | H | F | R | F | M | Q | I | L | I | E | E | Y | A | T | H | A | Q | A | S | L | V | P | Q | P | I | S | M | S | F | M | D | S | L | A | D | L | I | T | T | Y | A | S | A |   |   |   |
| Fulfu186212 | D | D  | A | N  | D | D  | G | F  | T | Q   | M | A   | K | N   | V | L   | R | A   | T | S   | A | P | I | E | T | P | D | D | I | A | G | F | L | A | 2 | M | Y | S | G | D | N | M | R | L | E | T | I | G | L | L | Y | T | T | S | A | T | A | C | L | L | G | L | A | R | D | D | D | R | H | T | E | F | V | E | A | M | Y | R | G | S | T | T | C | L | H | 2 | L | V | R | D | I | S | P | E | I | N | D | V | M | L | W | L | S | F | E | N | M | R | L | T | H | T | E | G | D | S | 1 | S  | P | I | V | W | R | K | L | G | D | V | T | T | D | I | F | A | A | G | F | H | R | E | A | K | N | T | S | K | T | P | F | F | L | A | E | C | R | R | K | A | F | V | A | A | Y | Q | L | D | K | F | I | A | T | L | L | D | L | P | P | R | I | L | R | R | Y | S | D | C | K | M | P | L | E | L | T | D | E | Q | E | L |   |   |
| Dotse147401 | D | D  | A | N  | D | D  | G | F  | S | Q   | M | V   | R | S   | V | F   | K | A   | T | S   | A | P | I | E | T | P | D | D | I | A | G | F | L | A | 2 | M | Y | S | G | E | N | M | R | L | E | T | I | G | L | L | Y | T | M | S | A | T | A | C | H | L | G | L | A | R | D | D | D | K | H | T | E | F | I | E | A | M | Y | R | G | S | T | S | C | L | R | 2 | L | V | R | D | I | S | P | E | I | N | D | V | M | L | W | L | S | F | E | N | M | R | L | T | H | T | E | G | D | S | 1 | S  | P | I | V | W | R | L | G | N | V | T | T | D | I | F | A | A | G | F | H | R | E | A | K | N | T | S | K | T | P | F | F | L | A | E | C | R | R | K | A | F | V | A | A | Y | Q | L | D | K | F | I | A | T | L | L | D | L | P | P | R | I | L | R | R | Y | S | D | C | K | M | P | L | E | L | T | D | E | Q | I |   |   |   |   |
| Fulfu186212 | L | S  | D | A  | G | E  | I | A  | Q | A   | R | A   | K | L   | S | P   | D | G   | W | S   | P | D | K | Q | Y | I | F | A | T | W | Q | R | V | R | F | Q | L | G | M | L | R | E | D | I | L | E | Y | P | F | L | P | P | T | L | E | N | N | A | A | L | 2 | K | N | L | A | R | R | C | H | Q | T | Y | D | S | L | F | S | H | L | K | Y | N | P | D | S | W | N | A | I | P | P | F | A | C | I | M | L | T | V | M | R | L | N | Y | L | Q | S | C | F | Q | I | Q | R | L | L | E | D | T  | E | P | S | A | W | F | E | L | L | R | I | S | A | E | T | V | A | T | V | L | Q | I | G | N | S | L | N | K | A | I | F | I | R | H | D | F | P | Y | I | 0 | V | L | A | Y | G | L | P | S | A | V | M | L | A | Y | A | L | Q | S | T | A | R | G | N | K | R | Q | A | L | P | S | D | L | S | R | A | S | L | I | R | H | L | S |
| Dotse147401 | L | S  | D | P  | E | A  | I | A  | Q | A   | R | A   | R | L   | S | P   | D | G   | W | S   | P | D | K | Q | Y | I | F | A | T | W | Q | R | V | R | F | Q | L | G | M | L | R | E | D | I | L | E | Y | P | F | L | P | P | T | L | E | N | N | A | A | L | 2 | K | N | L | A | Q | R | C | H | Q | T | Y | D | S | L | F | A | H | L | K | Y | N | P | D | S | W | N | A | I | P | P | F | A | C | I | M | L | T | V | M | R | L | N | Y | L | Q | S | C | F | Q | I | Q | R | L | L | Q | D | T  | E | P | S | A | W | S | E | L | L | R | V | S | A | E | T | V | A | T | V | L | Q | I | G | N | S | L | N | K | A | I | F | I | R | H | D | F | P | Y | I | 0 | V | V | A | Y | G | L | P | S | A | V | M | L | A | Y | A | L | Q | S | T | A | R | G | N | K | R | Q | A | L | P | S | D | L | S | R | A | S | L | I | R | H | I | A |
| Fulfu186212 | V | F  | V | S  | Q | L  | E | S  | I | C   | A | F   | S | E   | R | N   | Y | T   | I | C   | I | Q | A | S | K | A | I | T | R | A | L | D | E | V | L | E | M | F | A | T | F | A | A | M | S | N | E | A | P | Q | T | P | V | S | A | N | E | N | S | T | A | G | P | L | A | T | F | A | L | S | A | S | Q | P | V | M | L | D | T | A | M | N | V | C | A | D | L | I | S | G | D | L | L | D | G | F | D | L | S | S | W | V | K | N | I | D | W | T | G | T | G | G | E | W | S | T | F | -- |   |   |   |   |   |   |   |   |   |   |   |   |   |   |   |   |   |   |   |   |   |   |   |   |   |   |   |   |   |   |   |   |   |   |   |   |   |   |   |   |   |   |   |   |   |   |   |   |   |   |   |   |   |   |   |   |   |   |   |   |   |   |   |   |   |   |   |   |   |   |   |   |   |   |   |   |   |   |   |   |   |   |
| Dotse147401 | V | F  | V | S  | H | L  | E | S  | I | S   | D | F   | I | E   | R | N   | N | T   | I | C   | I | Q | A | S | K | A | I | T | R | A | L | D | E | V | L | E | M | F | A | T | F | A | A | A | - | A | S | I | A | P | Q | T | A | G | T | A | N | D | H | S | T | G | P | L | A | T | F | A | L | S | A | S | Q | P | I | L | P | D | G | N | M | N | V | C | A | D | L | E | S | G | D | L | L | D | G | F | D | L | S | S | W | V | K | N | I | D | W | T | G | T | G | G | E | W | S | T | F | -- |   |   |   |   |   |   |   |   |   |   |   |   |   |   |   |   |   |   |   |   |   |   |   |   |   |   |   |   |   |   |   |   |   |   |   |   |   |   |   |   |   |   |   |   |   |   |   |   |   |   |   |   |   |   |   |   |   |   |   |   |   |   |   |   |   |   |   |   |   |   |   |   |   |   |   |   |   |   |   |   |   |   |
