# Supplementary material for: Novel Introner-Like Elements in fungi Are Involved in Parallel Gains of Spliceosomal Introns
Source: PubMed Central journal article supplement (PMC4457414; doi:10.1371/journal.pone.0129302), 2015-06-05
Supplement: pone.0129302.s004.pdf [file pone.0129302.s004.pdf]

**S1 Table. GenBank accession numbers of the ITS and LSU sequences used in this study.**

Strain accession numbers correspond to the CBS-KNAW collection (CBS) or culture collection of Pedro Crous (CPC).

| <b>Fungal species</b>           | <b>Strain accession number</b> | <b>ITS sequence accession number</b> | <b>LSU sequence accession number</b> |
|---------------------------------|--------------------------------|--------------------------------------|--------------------------------------|
| <i>Amycosphaerella africana</i> | CBS 116154                     | AF173314.1                           | DQ246257.1                           |
| <i>Passalora brachycarpa</i>    | CBS 115124                     | GU214664.1                           | GQ852619.1                           |
| <i>Passalora microsora</i>      | CBS 123735                     | KJ633262                             | KJ633266                             |
| <i>Passalora perfoliati</i>     | CBS 113378                     | DQ676520.1                           | DQ676520.1                           |
| <i>Passalora daleae</i>         | CBS 113031                     | EU040236.1                           | EU040236.1                           |
| <i>Passalora capsicola</i>      | CBS 156.62                     | KJ633263                             | KJ633267                             |
| <i>Passalora miurae</i>         | CPC 14643                      | KJ633264                             | KJ633268                             |
| <i>Passalora smilacis</i>       | CBS 556.71                     | KJ633265                             | KJ633269                             |
