# Supplementary material for: Novel Introner-Like Elements in fungi Are Involved in Parallel Gains of Spliceosomal Introns
Source: PubMed Central journal article supplement (PMC4457414; doi:10.1371/journal.pone.0129302), 2015-06-05
Supplement: pone.0129302.s005.pdf [file pone.0129302.s005.pdf]

**S2 Table. Primers used in this study.**

| <b>Name</b>           | <b>Sequence (5' to 3')</b> |
|-----------------------|----------------------------|
| <i>Cf01-F</i>         | CTGAAGGGTGCTAGGCATCTTCG    |
| <i>Cf01-R</i>         | AAAAGCAAAGGGTACAAGGT       |
| <i>Cf02-F</i>         | CAGAAGGCATCATCTGTCTGAAA    |
| <i>Cf02-R</i>         | CAATGTCTCAGCAACTGCTACTGA   |
| <i>Cf0203Ds0105-F</i> | GGGYRGAAGGCATCRTYT         |
| <i>Cf0203Ds0105-R</i> | GAAACAGAAGGGTGTTAGC        |
| <i>Cf04Ds03-F</i>     | CCTAGGGAGTACATACAGTTGTG    |
| <i>Cf04Ds03-R</i>     | TCTCTCTCAGSACRMCCCTATAGG   |
| <i>Cf08Ds04-F</i>     | TTGTAGRGTRTACCTAWCGCATCGT  |
| <i>Cf08Ds04-R</i>     | ACCAGCACGTCAYCRTGAGA       |
